# Supplementary material
Source: PubMed Central journal article supplement (PMC7255621)
Supplement: NIHMS1590457-supplement-Supplement1.pdf [file NIHMS1590457-supplement-Supplement1.pdf]

## Supplementary Appendix

This appendix has been provided by the authors to give readers additional information about their work.

Supplement to: Spertus JA, Jones PG, Maron DJ, et al. Health status after invasive or conservative care in coronary and advanced kidney disease. *N Engl J Med* 2020;382:1619-28. DOI: [10.1056/NEJMoa1916374](https://doi.org/10.1056/NEJMoa1916374)

# Supplemental Appendices

|    |                                                                                                                                                                                                                                                                                                                                                                                                                                                                           |    |
|----|---------------------------------------------------------------------------------------------------------------------------------------------------------------------------------------------------------------------------------------------------------------------------------------------------------------------------------------------------------------------------------------------------------------------------------------------------------------------------|----|
| 1  | ISCHEMIA-CKD STUDY LEADERSHIP AND PERSONNEL.....                                                                                                                                                                                                                                                                                                                                                                                                                          | 2  |
| 2  | COLLABORATORS .....                                                                                                                                                                                                                                                                                                                                                                                                                                                       | 11 |
| 3  | SUPPLEMENTAL FIGURE 1: CONSORT DIAGRAM OF PATIENT FLOW .....                                                                                                                                                                                                                                                                                                                                                                                                              | 32 |
| 4  | SUPPLEMENTAL FIGURE 2 – POSTERIOR DISTRIBUTIONS OF TREATMENT EFFECT ON SEATTLE ANGINA QUESTIONNAIRE SUMMARY SCORES FOR A TYPICAL PATIENT .....                                                                                                                                                                                                                                                                                                                            | 33 |
| 5  | SUPPLEMENTAL FIGURE 3: POSTERIOR DISTRIBUTION OF ORS FOR MAIN AND CKD TRIALS: WE PLOTTED EACH RANDOMLY SAMPLED PAIR (N=20,000) OF THE POSTERIOR DISTRIBUTIONS OF ORS FOR A TREATMENT BENEFIT FROM ISCHEMIA-CKD (Y-AXIS) AND ISCHEMIA (X-AXIS). THE NARROW DISTRIBUTIONS IN ISCHEMIA REFLECT THE LARGER SAMPLE SIZE. THE PROPORTIONS OF PAIRS BELOW THE LINE OF UNITY REFLECT THE CONFIDENCE OF A LARGER TREATMENT BENEFIT IN THE ISCHEMIA COMPARED WITH ISCHEMIA-CKD..... | 34 |
| 6  | SUPPLEMENTAL TABLE 1: CLINICAL DIFFERENCES BETWEEN PARTICIPANTS (N=705) AND THOSE EXCLUDED FOR MISSING EITHER A BASELINE OR ALL FOLLOW-UP HEALTH STATUS ASSESSMENTS (N=30).....                                                                                                                                                                                                                                                                                           | 35 |
| 7  | SUPPLEMENTAL TABLE 2. BRIEF SYMPTOM QUESTIONNAIRE COMPLETION RATES AND REASONS FOR MISSINGNESS.....                                                                                                                                                                                                                                                                                                                                                                       | 37 |
| 8  | SUPPLEMENTAL TABLE 3: ODDS RATIOS (95% CREDIBLE INTERVALS) FOR BETTER HEALTH STATUS OVER TIME* .....                                                                                                                                                                                                                                                                                                                                                                      | 38 |
| 9  | SUPPLEMENTAL TABLE 4. TIME-AVERAGED AREA UNDER THE CURVE THROUGH 48 MONTHS (POSTERIOR MEAN AND 95% CREDIBLE INTERVALS).....                                                                                                                                                                                                                                                                                                                                               | 39 |
| 10 | SUPPLEMENTAL TABLE 5: COMPARISON OF ODDS RATIOS FOR HIGHER SAQ SUMMARY SCORES IN MODELS IGNORING DEATH AND IN JOINT MODELS OF SURVIVAL AND HEALTH STATUS* .....                                                                                                                                                                                                                                                                                                           | 40 |
| 11 | SUPPL TABLE 6: POSTERIOR PROBABILITIES OF TREATMENT EFFECT COMPARED TO MAIN TRIAL .....                                                                                                                                                                                                                                                                                                                                                                                   | 41 |
| 12 | SUPPLEMENT 7: THE 7-ITEM SEATTLE ANGINA QUESTIONNAIRE.....                                                                                                                                                                                                                                                                                                                                                                                                                | 42 |

## 1 ISCHEMIA-CKD Study Leadership and Personnel

### **ISCHEMIA-CKD Committee Members**

#### **Steering Committee**

Sripal Bangalore, Principal Investigator  
Judith S. Hochman, ISCHEMIA trial Chair  
David J. Maron, ISCHEMIA trial Co-Chair  
Glenn M. Chertow, Nephrologist  
William Boden, ISCHEMIA trial Co-PI  
Bruce Ferguson, ISCHEMIA trial Co-PI  
Robert Harrington, ISCHEMIA trial Co-PI  
Gregg W. Stone, ISCHEMIA trial Co-PI  
David O. Williams, ISCHEMIA trial Co-PI

#### **Renal Committee**

Charles A. Herzog (Chair)  
Sripal Bangalore  
Carlo Briguori  
David M. Charytan  
Glenn M. Chertow  
Jerome Fleg  
Peter A. McCullough  
Roxana Mehran  
Ruth Kirby

#### **Publications Sub-Committee**

Sripal Bangalore (Chair)  
Karen Alexander  
Jerome Fleg  
Judith S. Hochman  
David J. Maron  
Roy Mathew  
Sean M. O'Brien  
Harmony R. Reynolds  
Mandeep Sidhu

#### **Optimal Medical Therapy Committee (Same as ISCHEMIA)**

William Boden (Co-Chair)  
David J. Maron (Co-Chair)  
Christie Ballantyne  
Sripal Bangalore

Karen Calfas \*\*  
Bernard R. Chaitman  
Mary Ann Champagne  
Michael Davidson  
Jerome Fleg  
Peter A. McCullough  
Jonathan Newman  
Peter Stone

**Optimal Revascularization Therapy Planning Committee (Same as ISCHEMIA)**

Gregg W. Stone (Chair)  
**Subcommittee: CABG**  
Bruce Ferguson (Co-Chair)  
Philippe Menasche (Co-Chair)  
Sripal Bangalore  
Michael Davidson\*\*  
Stephen Fremes  
Robert Guyton  
Michael Mack  
Fred Mohr  
Anupama Rao  
Joe Sabik  
Oz Shapira  
David Taggart  
James Tatoulis

**Subcommittee: PCI**  
David Williams (Co-Chair)  
Sripal Bangalore  
Jim Blankenship  
Sorin Brener  
Chris Buller  
Antonio Colombo  
Bernard de Bruyne  
Philippe G n reux  
Robert Harrington  
Dean Kereiakes  
Thierry Lefevre  
Jeffrey Moses

**Clinical Events (Same as ISCHEMIA)**

**Endpoint Definition Panel**  
Bernard R. Chaitman (Chair)  
Karen P. Alexander

Judith S. Hochman  
Ken Mahaffey  
David J. Maron  
Gregg W. Stone  
Harvey White

**Clinical Event Review Committee**

Bernard R. Chaitman (Chair)  
Salvador Cruz-Flores  
Nicholas Danchin  
Eli Feen  
Mario J. Garcia  
Paul Hauptman  
Abhay A. Laddu  
Eugene Passamani  
Ileana L. Pina  
Maarten Simoons  
Hicham Skali  
Kristian Thygesen  
David Waters

**CEC Administrative Group**

Karen P. Alexander  
Patricia Endsley\*  
Gerard Esposito  
Jeffrey Kanters  
John Pownall  
Dimitrios Stournaras

**BioRepository Committee (Same as ISCHEMIA)**

Jeffrey Berger (Chair)  
Claes Held  
Iftikhar Kullo  
Bruce McManus  
Kristin Newby

**EQOL Committee (Same as ISCHEMIA)**

Daniel Mark (Co-Chair)  
John Spertus (Co-Chair)  
David Cohen  
William Weintraub

**Recruitment for Women & Minorities (Same as ISCHEMIA)**

C. Noel Bairey Merz (Chair)  
Raffaele Bugiardini

Jelena Celutkiene  
Jorge Escobedo  
Angela Hoye  
Radmila Lyubarova  
Deirdre Mattina  
Jesus Peteiro  
Harmony R. Reynolds  
Paola Smanio

**DSMB Members**

Lawrence Friedman (Chair)  
Jeffrey Anderson  
Jessica Berg\*  
David DeMets  
C. Michael Gibson  
Gervasio Lamas  
Nicole Deming  
Jonathan Himmelfarb  
Pamela Ouyang  
Pamela Woodard

**Independent Statistical Analysis Center for DSMB Reporting (Same as ISCHEMIA)**

Frank Harrell  
Samuel Nwosu

**National Heart, Lung, and Blood Institute**

Jerome L. Fleg, Project Officer  
Ruth Kirby

**ISCHEMIA Clinical Coordinating Center (CCC)**

***Study Leadership***

Sripal Bangalore (Principal Investigator)

***CCC Faculty***

Jeffrey Berger (Director of the Biorepository, ISCHEMIA Regional Leader)  
Roy Mathew (Country Lead Nephrologist for US)  
Jonathan Newman (ISCHEMIA Regional Leader)  
Harmony R. Reynolds (ISCHEMIA Regional Leader)  
Mandeep Sidhu (US-VA Regional Co-Leader)

***Program Director***

Stephanie Mavromichalis

***Project Managers***

Gia Cobb\*  
Stephanie Ferket \*  
Andre Gabriel \*

***Clinical Research Associates***

Diana Cukali\*  
Kevin McMahon \*

***Clinical Trial Assistants***

Ahmed Ayoub\*  
Matthew Shinseki \*  
Paula Wilson\*  
Solomon Yakubov \*

***Data Analyst***

Mark Xavier \*

*\*see ISCHEMIA Manuscript for complete listing*

*\*\*past members*

**ISCHEMIA Statistical and Data Coordinating Center, Duke Clinical Research Institute (Same as ISCHEMIA)**

Sean M. O'Brien (Principal Investigator)  
Karen P. Alexander (Co-Principal Investigator)  
Akshay Bagai\*  
Samuel  
Broderick  
Michelle  
Crowder  
Derek Cyr  
Patricia Endsley  
Jyotsna Garg  
Xiangqiong Gu  
Robert  
Harrington\*  
Lisa Hatch  
Anne Heath\*  
Zhen Huang  
Jeffrey Kanters  
Kerry Lee\*  
Jeff Leimberger  
Jill Marcus  
Courtney Page  
Wanda Parker\*

Wayne  
Pennachi  
John Pownall  
Frank Rockhold  
Susanna  
Stevens  
Allegra Stone  
Dimitrios  
Stournaras  
Omar  
Thompson  
Sheri Ussery  
Jennifer White\*  
Mary (Kaye)  
Williams  
Weibing Xing  
Songlin Zhu

**ECG/ETT CoreLab (Same as ISCHEMIA)**

Bernard R. Chaitman (Director)  
Jane Eckstein  
Bandula Guruge  
Mary Streif

**Angiographic Core Lab (Same as ISCHEMIA)**

Ziad Ali (Director)  
Philippe Genereux (Director) \*  
Maria A. Alfonso  
Maria P. Corral  
Javier J. Garcia  
Jennifer Horst  
Ivana Jankovic  
Maayan Konigstein  
Mitchel B. Lustre\*  
Yolayfi Peralta  
Raquel Sanchez

**Academic Research Organizations (AROs) (Same as ISCHEMIA)**

Associazione Nazionale Medici Cardiologi Ospedalieri (ANMCO) -Italy & Switzerland

Aldo P. Maggioni (Country Leader)  
Francesca Bianchini  
Martina Ceseri  
Andrea Lorimer



Marco Magnoni  
Francesco Orso  
Laura Sarti  
Martinia Tricoli\*

Brazilian Clinical Research Institute (BCRI) - Brazil

Antonio Carvalho (Country Leader)\*\*

Renato Lopes (Country Leader)

Lilian Mazza Barbosa

Tauane Bello Duarte

Tamara Colaiácovo Soares

Julia de Aveiro Morata

Pedro Carvalho

Natalia de Carvalho Maffei

Flávia Egydio\*

Anelise Kawakami\*

Janaina Oliveira\*

Elissa Restelli Piloto\*

Jaqueline Pozzibon\*

Canadian Heart Research Centre (CHRC) - Canada

Shaun Goodman (Country Leader)

Diane Camara

Neamat Mowafy

Caroline Spindler

China Oxford Centre for International Health Research - China

Lixin Jiang (Country Leader)

Hao Dai

Fang Feng

Jia Li

Li Li\*

Jiamin Liu

Qiulan Xie

Haibo Zhang

Jianxin Zhang

Lihua Zhang

Liping Zhang

Ning Zhang

Hui Zhong

Estudios Clínicos Latino America (ECLA) - Argentina

Rafael Diaz\*

Claudia Escobar

Maria Eugenia Martin\*

Andrea Pascual\*

Foundation for Biomedical Research of La Paz University Hospital (FIBHULP) - Spain

José Lopez-Sendon (Country Leader)

Paloma Moraga

Victoria Hernandez

Almudena Castro

Maria Posada\*

Sara Fernandez

José Luis Narro Villanueva

Rafael Selgas

French Alliance for Cardiovascular Trials (FACT) - France

Gabriel Steg (Country Leader)

Helene Abergel

Jean Michel Juliard

Green Lane Coordinating Centre Ltd. (GLCC) -Malaysia, New Zealand, Singapore, Taiwan, Thailand

Harvey White (Country Leader)

Caroline Alsweiler

KU Leuven Research & Development - Belgium\*

Frans Van de Werf (Country Leader)

Kathleen Claes

Kaatje Goetschalckx

Ann Luyten

Valerie Robesyn

South Australian Health and Medical Research Institute Ltd (SAHMRI) - Australia

Joseph B. Selvanayagam (Country Leader)

Deirdre Murphy

### **Contract Research Organizations (CROs) for ISCHEMIA Trial**

FOCUS Clinical Research Center d.o.o. Belgrade - Serbia

Nevena Garcevic

Jelena Stojkovic

iProcess Global Research Inc. - India

Asker Ahmed

Richa Bhatt

Nitika Chadha\*

Vijay Kumar\*

Sadath Lubna\*

Pushpa Naik

Shruti Pandey\*

Karthik Ramasamy\*

Mohammed Saleem

Pratiksha Sharma

Hemalata Siddaram\*

*\*past members / past organizations*  
*\*\*deceased*

## 2 Collaborators

| Country<br>(No. Randomizations)                                           | Investigator(s)                                                                                                                                                                                      | Study Coordinator(s)                                                                                              | City & State<br>(if applicable) | Institution (No.<br>Randomizations)                    |
|---------------------------------------------------------------------------|------------------------------------------------------------------------------------------------------------------------------------------------------------------------------------------------------|-------------------------------------------------------------------------------------------------------------------|---------------------------------|--------------------------------------------------------|
| <b>United States (159)</b><br>Lead Country Nephrologist<br>Roy Mathew, MD | Mayil S. Krishnam, MD, MBA<br>Jeffrey C. Milliken, MD<br>Pranav M. Patel, MD<br>Arnold H. Seto, MD<br>Kevin T. Harley, MD (N)<br>Michael A. Gibson, MD<br>Byron J. Allen, MD<br>Wei Ling Lau, MD (N) | Shirin Heydari, MS<br>Edgar Karanjah, MD<br>Wanda C. Marfori, MD<br>Eduardo Hernandez-<br>Rangel, MD<br>Pam Singh | Orange, CA                      | University of California Irvine<br>Medical Center (23) |
|                                                                           | Patricia Pellikka, MD<br>LaTonya J. Hickson, MD (N)                                                                                                                                                  | Gaylin Petty, CVT<br>Susan K. Milbrandt<br>Dawn D. Shelstad                                                       | Rochester, MN                   | Mayo Clinic (16)                                       |
|                                                                           | Harmony R. Reynolds, MD<br>Jonathan D. Newman, MD, MPH<br>Sripal Bangalore, MD, MHA<br>Lawrence M. Phillips, MD<br>Muhamed Saric, MD<br>Olga Zhdanova, MD (N)                                        | Stanley E. Cobos, BA<br>Kirsten J. Quiles, MS<br>Raven R. Dwyer, MPH<br>Dalisa Espinosa, MBS                      | New York, NY                    | NYU Langone Medical Center-<br>Bellevue Hospital (15)  |
|                                                                           | Kreton Mavromatis, MD<br>Jason Linefsky, MD<br>Harold Franch, MD (N)                                                                                                                                 | John Doan, MD<br>Raven Lee, CCRP<br>Risha Patel                                                                   | Decatur, GA                     | Atlanta VA Medical Center (13)                         |
|                                                                           | Anjali Acharya, MD (N)<br>Seth Sokol, MD<br>Jay Meisner, MD<br>Amit Kakkar, MD<br>Tarek Rashid, MD<br>Hatem Elabd, MD                                                                                | Jeanne Russo, RN<br>Cidney Schultz, RN                                                                            | Bronx, NY                       | Jacobi Medical Center (12)                             |
|                                                                           | Charles Herzog, MD<br>Mengistu Simegn, MD                                                                                                                                                            | Shari Mackedanz<br>Barbara Wicklund                                                                               | Minneapolis, MN                 | Hennepin County Medical Center<br>(9)                  |

|                                                                                                                                                                                                                                                                                                               |                                                                                                                                                         |              |                                                     |
|---------------------------------------------------------------------------------------------------------------------------------------------------------------------------------------------------------------------------------------------------------------------------------------------------------------|---------------------------------------------------------------------------------------------------------------------------------------------------------|--------------|-----------------------------------------------------|
| Salvatore P. Costa, MD<br>Terrance Welch, MD<br>Michael Chobanian, MD (N)                                                                                                                                                                                                                                     | Henry C. Stokes, RN<br>Gaylin Petty, CVT                                                                                                                | Lebanon, NH  | Dartmouth Hitchcock Medical Center (7)              |
| Subhash Banerjee, MD                                                                                                                                                                                                                                                                                          | Preeti Kamath, BDS, MHA, CCRP<br>Ishita Tejani, BDS, MS, MSPH                                                                                           | Dallas, TX   | V.A. North Texas Health Care System (6)             |
| Adedayo Adeboye, MD<br>Roy Mathew, MD (N)                                                                                                                                                                                                                                                                     | Amy Flowers<br>Kathryn Mason<br>Anjana Rishmawi                                                                                                         | Columbia, SC | William Jennings Bryan Dorn V.A. Medical Center (5) |
| Sudhanva S. Hegde, MD                                                                                                                                                                                                                                                                                         | Stanley E. Cobos, BA<br>Raven R. Dwyer, MPH<br>Dalisa Espinosa, MBS<br>Kirsten J. Quiles, MS<br>Carolyn J. Gruber, PA-C<br>Noelle M. Durfee, MS<br>PA-C | Brooklyn, NY | Kings County Hospital Center (9)                    |
| Khaled Abdul-Nour, MD<br>Lalathaksha Kumbar, MD (N)<br>Jerry Yee, MD (N)                                                                                                                                                                                                                                      | Heather Golden<br>Naima L. Ogletree, DNP, APRN-BC<br>Schawana Thaxton, DNP, NP-C                                                                        | Detroit, MI  | Henry Ford Health System (4)                        |
| Alec Moorman, MD<br>Bilal Malik, MD (N)                                                                                                                                                                                                                                                                       | Fatima Ranjbaran, RN<br>Bryn Smith, BS<br>Carly Ohmart                                                                                                  | Seattle, WA  | University of Washington Medical Center (4)         |
| Radmilar Lyubarova, MD<br>Mohammad El-Hajjar, MD<br>Mandeep S. Sidhu, MD, MBA<br>Steven A. Fein, MD<br>Mikhail T. Torosoff, MD, PhD<br>Radmila Lyubarova, MD<br>Sulagna Mookherjee, MD<br>Krzysztof Drzymalski, MD<br>Rafia Chaudhry, MD (N)<br>Krishnakumar Hongalgi, MD (N)<br>Arif Asif, MD (N)(2012-2015) | Wendy L. Stewart, MS<br>Kristin M. Salmi, BS                                                                                                            | Albany, NY   | Albany Medical Center Hospital (3)                  |

Loay Salman, MD (N)(2015-2018)

|                                       |                          |                |                                                        |
|---------------------------------------|--------------------------|----------------|--------------------------------------------------------|
| Patricia K. Nguyen, MD                | Davis Vo, BS             | Palo Alto, CA  | VA Palo Alto Healthcare System (3)                     |
| Yiming Lit, MD (N)                    | James Hirsch, BS         |                |                                                        |
| Steven P. Sedlis, MD                  | Leandro C. Maranan, CCRC | New York, NY   | VA New York Harbor Health Care System (3)              |
| Robert M. Donnino, MD                 |                          |                |                                                        |
| Jeffrey Lorin, MD                     |                          |                |                                                        |
| David Goldfarb, MD (N)                |                          |                |                                                        |
| Mohammad El-Hajjar, MD                | Jennifer Thomson, MA     | Albany, NY     | Samuel Stratton VA Medical Center of Albany NY (2)     |
| Paul Der Mesropian, MD (N)            |                          |                |                                                        |
| Joseph Sacco, MD                      |                          |                |                                                        |
| Naveed Akhtar, MD                     |                          |                |                                                        |
| Maris Orgera, MD                      |                          |                |                                                        |
| Mandeep S. Sidhu, MD, MBA (2012-2016) |                          |                |                                                        |
| Roy Mathew, MD (N) (2012-2015)        |                          |                |                                                        |
| Elvira Gosmanova, MD (N) (2015-2018)  |                          |                |                                                        |
| Fadi Hage, MD                         | Badhma Valaiyapathi, MD  | Birmingham, AL | UAB Vascular Biology and Hypertension Program (2)      |
| Dana Rizk, MD (N)                     |                          |                |                                                        |
| James E. Davies, MD                   |                          |                |                                                        |
| Massoud Leesar, MD                    |                          |                |                                                        |
| Jaekyeong Heo, MD                     |                          |                |                                                        |
| Amy Iskandrian, MD                    |                          |                |                                                        |
| Firas Al Solaiman, MD                 |                          |                |                                                        |
| Satinder Singh, MD                    |                          |                |                                                        |
| Peter H. Stone, MD                    | Hermine Osseni, MS       | Boston, MA     | Brigham & Women's Hospital, Harvard Medical School (2) |
| David Charytan, MD (N)                | Charlene Wiyarand (BS)   |                |                                                        |
|                                       | Peter Douglass, BA       |                |                                                        |
|                                       | Hayley Pomeroy, BA       |                |                                                        |
|                                       | Alexandra Craft, BA      |                |                                                        |
|                                       | Bethany Harvey, BA       |                |                                                        |
| Kevin Marzo, MD                       | Wendy Drewes, RN         | Mineola, NY    | NYU Winthrop (2)                                       |
| Juan Gaztanaga, MD                    |                          |                |                                                        |
| Shayan Shirazian, MD (N)              | Dipti Patel, RN          |                |                                                        |
| Lekshmi Dharmarajan, MD               | Jenne M. Jose, PA        | Bronx, NY      | NYU-HHC Lincoln Medical and Mental Health Center (2)   |
|                                       | Stanley E. Cobos, BA     |                |                                                        |

|                                                                                         |                                                                                                                                   |                   |                                                          |
|-----------------------------------------------------------------------------------------|-----------------------------------------------------------------------------------------------------------------------------------|-------------------|----------------------------------------------------------|
|                                                                                         | Raven R. Dwyer, MPH<br>Kirsten J. Quiles, MS                                                                                      |                   |                                                          |
| Janani Rangaswami, MD (N)<br>Christian Witzke, MD<br>Gregg Pressman, MD                 | Rachel Murphy, BS<br>Kinnari Murphy, MPH                                                                                          | Philadelphia, PA  | Albert Einstein Medical Center (2)                       |
| John B. Kostis, MD<br>Abel E. Moreyra, MD<br>Jonathan Lebowitz, MD (N)                  | Nora M. Cosgrove, RN                                                                                                              | New Brunswick, NJ | Cardiovascular Institute, Rutgers RWJ Medical School (1) |
| Ellis W. Lader, MD<br>Beth Stefanchik, MD (N)                                           | Martha Meyer, RN, MSN                                                                                                             | Kingston, NY      | Mid Valley Cardiology (1)                                |
| Sampoonima Setty, MD<br>Balaji Srinivasan, MD (N)                                       | Kimberly E. Halverson, RHIT<br>Christine Roraff, RN<br>Jonean Thorsen, RN                                                         | La Crosse, WI     | Gundersen Lutheran Medical Center (1)                    |
| Rita Coram, MD                                                                          | Anne Marie Webb, BSN<br>Ellie Fridell, BS<br>Heidi Wilson, BS                                                                     | Louisville, KY    | University of Louisville (1)                             |
| David Booth, MD<br>John Kotter, MD<br>Ahmed Abdel-Latif, MD, PhD<br>Sadiq Ahmed, MD (N) | Yvonne Taul, RN<br>Caroline Rodgers, RN<br>Jennifer Isaacs, MS<br>Viktoria Bulkley, RN<br>Laura True, RN<br>Alexandra Hunter, MPH | Lexington, KY     | Lexington VA Medical Center (1)                          |
| Michelle Ratliff, MD<br>Karen Sevilla, MD (N)                                           | Robyn Elliott<br>Jennifer Hogan                                                                                                   | Albuquerque, NM   | New Mexico V.A. Healthcare System (1)                    |
| James J. Jang, MD<br>Gennie Yee, MD<br>Deepa Ramaswamy, MD (N)                          | Olivia Anaya                                                                                                                      | San Jose, CA      | Kaiser Permanente San Jose (1)                           |
| Michel Georges Khouri, MD<br>John Middleton, MD (N)                                     | Kristine Arges<br>Melissa LeFevre<br>Jennifer Tomfohr                                                                             | Durham, NC        | Duke University Medical Center (1)                       |
| Jason T. Call, MD<br>David Sisson, MD (N)                                               | Stephanie, M. Lane, RN, BSN, CCRN<br>Jennifer L. Stanford, RN, MSN                                                                | Winchester, VA    | Winchester Cardiology and Vascular Medicine, PC (1)      |

|                                                                                                                                   |                                                                       |                         |                                                                                                                 |
|-----------------------------------------------------------------------------------------------------------------------------------|-----------------------------------------------------------------------|-------------------------|-----------------------------------------------------------------------------------------------------------------|
| Prakash Deedwania, MD<br>Kiran Reddy, MD<br>Mei Hwang, MD (N)                                                                     | Antonia Vega                                                          | Fresno, CA              | UCSF - Fresno Community<br>Regional Medical Center (1)                                                          |
| Steven Weitz, MD<br>Page Salanger, MD (N)                                                                                         | Steven Giovannone<br>Lori Pritchard, RN                               | Schenectady,<br>NY      | Cardiology Associates of<br>Schenectady P.C. (1)                                                                |
| Ray Wyman, MD                                                                                                                     | Joy Burkhardt, CCRP<br>Suellen Hosino, RN,<br>BSN, CCRP               | Torrance, CA            | Torrance Memorial Medical<br>Center (1)                                                                         |
| Khaled Dajani, MD<br>Holly Mattix-Kramer, MD (N)<br>Verghese Mathew, MD                                                           | Carol M. Kartje, BSN                                                  | Maywood, IL             | Loyola University Medical Center<br>(1)                                                                         |
| Michael D. Shapiro, DO<br>Jose Rueda, MD (N)                                                                                      | Aynun Naher, MBBS,<br>MS<br>David Schlichting, LPN                    | Portland, OR            | Oregon Health & Science<br>University (1)                                                                       |
| Omar Almousalli, MD<br>John Lehman, MD<br>Norbert Urbanski, MD                                                                    | Elizabeth Capasso-<br>Gulve<br>Alaine Melanie Loehr<br>Marlowe Mosley | Fairview<br>Heights, IL | Advanced Heart Care Group /<br>MEDICORICIUM, L.L.C. (1)                                                         |
| Alexander M. Chernyavskiy, MD,<br>PhD<br>Evgeniy I. Kretoy, MD<br>Igor O. Grazhdankin, MD<br>Alexander Sergeevich Borisov, MD (N) | Ivan A. Naryshkin, MD                                                 | Novosibirsk             | E. Meshalkin National Medical<br>Research Center of the Ministry<br>of Health of the Russian<br>Federation (73) |
| Leo A. Bockeria, MD, PhD<br>Karen Petrosyan, MD, PhD<br>Evgeny Shutov, MD (N)                                                     | Olga Bockeria, MD, PhD<br>Zalina Kudzoeva, MD                         | Moscow                  | National Medical Research<br>Center for Cardiovascular<br>Surgery (34)                                          |

**Russia (111)**

Lead Country Cardiologist  
Olga Bockeria, MD, PhD  
Lead Country Nephrologist  
Evgeny Shutov, MD



|                                      |                   |                  |                                            |
|--------------------------------------|-------------------|------------------|--------------------------------------------|
| Leonid L. Bershtein, MD, PhD         | Irina Subbotina   | Saint Petersburg | North-Western State Medical University (4) |
| Sergey A. Sayganov, MD, PhD          | Victoria Gumerova |                  |                                            |
| Anastasia M. Kuzmina-Krutetskaya, MD |                   |                  |                                            |
| Elizaveta V. Zbyshevskaya, MD, PhD   |                   |                  |                                            |
| Nana O. Katamadze, MD, PhD           |                   |                  |                                            |
| Vladimir Ryasniansky, MD (N)         |                   |                  |                                            |

### Poland (105)

Lead Country Cardiologists  
 Radoslaw Pracon, MD, PhD  
 Marcin Demkow, MD, PhD  
 Lead Country Nephrologist  
 Robert Malecki, MD

|                          |                          |          |                                                                                                                   |
|--------------------------|--------------------------|----------|-------------------------------------------------------------------------------------------------------------------|
| Tomasz Mazurek, MD, PhD  | Jakub Maksym, MD         | Warszawa | Medical University of Warsaw (57)                                                                                 |
| Karolina Wojtera, MD     |                          |          |                                                                                                                   |
| Anna Fojt, MD            |                          |          |                                                                                                                   |
| Ewa Szczerba, MD         |                          |          |                                                                                                                   |
| Piotr Pruszczyk, MD, PhD | Andrzej Łabyk, MD        | Warszawa | Department of Internal Medicine and Cardiology, Infant Jesus Teaching Hospital, Medical University of Warsaw (22) |
| Marek Roik, MD, PhD      | Agnieszka Szramowska, MD |          |                                                                                                                   |
|                          | Olga Zdończyk, MD        |          |                                                                                                                   |
| Marcin Demkow, MD, PhD   | Olga Walesiak            | Warsaw   | Coronary and Structural Heart Diseases Department, Institute of Cardiology (19)                                   |
| Radoslaw Pracon, MD, PhD | Katarzyna Malinowska     |          |                                                                                                                   |
| Cezary Kepka, MD PhD     |                          |          |                                                                                                                   |
| Anna Teresinska, MD PhD  |                          |          |                                                                                                                   |
| Karolina Kryczka, MD PhD |                          |          |                                                                                                                   |
| Jan Henzel, MD PhD       |                          |          |                                                                                                                   |
| Mateusz Solecki, MD PhD  |                          |          |                                                                                                                   |
| Edyta Kaczmarek, MD PhD  |                          |          |                                                                                                                   |
| Robert Malecki, MD (N)   |                          |          |                                                                                                                   |
| Jaroslaw Drozd, PhD      | Marta Swiderek, MA       | Lodz     | Cardiology Clinic, Medical University in Lodz (7)                                                                 |

|                                         |                     |
|-----------------------------------------|---------------------|
| Bartosz Czarniak, MD                    | Ewelina Wojtala, MA |
| Malgorzata Frach (formerly Stasiak), MD |                     |
| Konrad Szymczyk, MD                     |                     |
| Iwona Niedzwiecka, MD                   |                     |
| Sebastian Sobczak, MD                   |                     |
| Tomasz Ciurus, MD                       |                     |
| Piotr Jakubowski, MD                    |                     |
| Magdalena Misztal-Teodorczyk, MD        |                     |
| Dawid Teodorczyk, MD                    |                     |
| Aleksandra Fraczak, MD                  |                     |
| Marcin Szkopiak, MD                     |                     |
| Patrycja Lebioda, MD                    |                     |
| Michal Wlodarczyk, MD                   |                     |
| Anna Plachcinska, MD                    |                     |
| Jacek Kusmierek, MD                     |                     |
| Magdalena Miller, MD                    |                     |
| Halina Marciniak, MD                    |                     |
| Karolina Wojtczak-Soska, MD             |                     |
| Katarzyna Łuczak, MD                    |                     |
| Tomasz Tarchalski, MD                   |                     |
| Anna Cichocka-Radwan, MD                |                     |

---

**India (92)**

Lead Country Cardiology  
Balram Bhargava, DM  
Lead Country Nephrologist  
Sandeep Mahajan, MD

|                                              |                                                       |           |                                    |
|----------------------------------------------|-------------------------------------------------------|-----------|------------------------------------|
| Sajeev Chakanalil Govindan, MD, DNB, DM, PhD | Anjali Anand, MSc                                     | Calicut   | Government Medical College (23)    |
| Rajesh Gopalan Nair, MD, DNB, DM             | Janitha Raj, B.Tech                                   |           |                                    |
| Melemadathil Srilatha, MD, DM (N)            | Reshma Ravindran, MSc<br>Rajalekshmi VS, MSc, MScCRRA |           |                                    |
| Atul Mathur, MD                              | Ajit Singh Narula, MD                                 |           | Fortis Escort Heart Institute (13) |
| Upendra Kaul, MD                             | Vijay Kher, MD                                        | New Delhi |                                    |
| Sanjeev Gulati MD, DM (N)                    | Puneet Sodhi, MD                                      |           |                                    |

---

|                                                                                                                                                                                                                                                                                                                                                                                                                         |                                                                                   |            |                                                                          |
|-------------------------------------------------------------------------------------------------------------------------------------------------------------------------------------------------------------------------------------------------------------------------------------------------------------------------------------------------------------------------------------------------------------------------|-----------------------------------------------------------------------------------|------------|--------------------------------------------------------------------------|
| Anoop Mathew, MD<br>Eapen Punnoose, MD<br>TA Kishore, MD (N)<br>Satish Sankaranarayanan, MD (N)                                                                                                                                                                                                                                                                                                                         | Binoy Mannekkattukudy<br>Kurian                                                   | Kolenchery | MOSC Medical College Hospital<br>(12)                                    |
| Ranjan Kachru, MD<br>Sanjeev Gulati, MD (N)                                                                                                                                                                                                                                                                                                                                                                             | Abhishek Dubey,<br>PGDACR                                                         | New Delhi  | Fortis Healthcare Fl.t Lt. Rajan<br>Dhall Hospital (11)                  |
| Balram Bhargava, DM<br>Sandeep Mahajan, MD (N)<br>G.Karthikeyan, DM<br>S.Ramakrishnan, DM<br>Sandeep Seth, DM<br>Rakesh Yadav, DM<br>Sandeep Singh, DM<br>Ambuj Roy, DM<br>Neeraj Parakh, DM<br>Sunil Kumar Verma, DM<br>Rajiv Narang, DM<br>Sundeep Mishra, DM<br>Nitish Naik, DM<br>Gautam Sharma, DM<br>Shiv Kumar Choudhary, M.Ch<br>Chetan Patel, DNB<br>Gurpreet Gulati, MD<br>Sanjeev Sharma, MD<br>V K Bahl, DM | Chandini Suvarna, BDS                                                             | New Delhi  | All India Institute Of Medical<br>Sciences (8)                           |
| Neeraj Pandit, MD, DM<br>Ajay Sharma, MD, DM<br>Niruta Sharma MD<br>Hemant Shakhar Mahapatra MD                                                                                                                                                                                                                                                                                                                         | Sheromani Bajaj<br>Vandana Yadav,<br>Msc, PGDACR<br>Girish Mishra, Msc,<br>PGDACR | New Delhi  | Dr Ram Manohar Lohia Hospital<br>(5)                                     |
| Cholenahally Nanjappa Manjunath,<br>MD, DM                                                                                                                                                                                                                                                                                                                                                                              | Nandita Nataraj,<br>BE (Biotech)<br>PGDICRCDM                                     | Bengaluru  | Sri Jayadeva Institute of<br>Cardiovascular Sciences and<br>Research (4) |

|                                         |                                               |           |                                                                           |
|-----------------------------------------|-----------------------------------------------|-----------|---------------------------------------------------------------------------|
| Nagaraja Moorthy, MD, DM                | Soundarya Nayak,<br>BE(Biotech)<br>PGDICRCMD  |           |                                                                           |
| Satvic Cholenahally Manjunath,<br>MD,DM | Mahevamma Mylarappa,<br>GNM (General Nursing) |           |                                                                           |
| Suryaprakash Narayanappa,<br>MBBS       |                                               |           |                                                                           |
| Umesh Lingaraj, MD (N)                  |                                               |           |                                                                           |
| Veerabhadra Gupta, MD (N)               |                                               |           |                                                                           |
| Milind Avdhoot Gadkari, MD              | Sheetal Rupesh Karwa,<br>BHMS                 | Pune      | KEM Hospital Pune (4)                                                     |
| Siddharth Gadage, MD DNB                | Suvarna Kolhe, MSc                            |           |                                                                           |
| Tapan Umesh Pillay, BHMS MSc            |                                               |           |                                                                           |
| Valentine Lobo, MD (N)                  |                                               |           |                                                                           |
| Johann Christopher, MD, DNB             | K. Manjula Rani, MSc.                         | Hyderabad | Gurunanak CARE Hospital (3)                                               |
| Nirmal Kumar, MD, DM                    | M. Sowjanya Reddy,<br>BSc                     |           |                                                                           |
| Suresh Kumar, MD, DM (N)                | K. Preethi, BSc                               |           |                                                                           |
| John Jose, MD                           | Anu Tharini                                   | Vellore   | Christian Medical College (3)                                             |
| Vinoi George David, MD (N)              | Anandaroop Lahiri                             |           |                                                                           |
| Gurpreet S. Wander, DM                  | Baljeet Kaur, MSc<br>(Biotechnology)          | Ludhiana  | Hero DMC Heart Institute,<br>Dayanand Medical College and<br>Hospital (2) |
| Rohit Tandon, MD                        | Sonika Gupta, MBA, B.<br>Pharmacy             |           |                                                                           |
| Sarju Ralhan, M.Ch (CTVS)               |                                               |           |                                                                           |
| Naved Aslam, DM                         |                                               |           |                                                                           |
| Abhishek Goyal, DM                      |                                               |           |                                                                           |
| Vikas Makkar, DM (N)                    |                                               |           |                                                                           |
| S.K. Dwivedi, DM                        | Roma Tewari, PG                               | Lucknow   | King George's Medical<br>University, Department of<br>Cardiology (2)      |
| V.S. Narain, DM                         | Meenakshi Mishra, PG                          |           |                                                                           |
| Sharad Chandra, DM                      | Shivali Patel                                 |           |                                                                           |
|                                         | Suman Singh, PG                               |           |                                                                           |
| Johann Christopher, MD                  | Sowjanya Reddy                                | Hyderabad | CARE Hospital (1)                                                         |
| Praneeth Polamuri, MD                   | Manjula Rani                                  |           |                                                                           |
| Vikranth Reddy, MD, DNB (N)             |                                               |           |                                                                           |
| Upendra Kaul, MD                        | Priyadarshani Arambam                         | New Delhi | Batra Hospital and Medical<br>Research Centre (BHMRC) (1)                 |

Bebek Singh

**China (70)**

Lead Country Cardiologist

Lixin Jiang, MD, PhD

Lead Country Nephrologists

Xuemei Li, MD

|                                                               |                                                                                                |           |                                                              |
|---------------------------------------------------------------|------------------------------------------------------------------------------------------------|-----------|--------------------------------------------------------------|
| Hong Cheng, MD<br>Weijing Bian, MD<br>Guoqin Wang, MD         | Jing Dong, MD<br>Xiaoyi Xu, MD                                                                 | Beijing   | Beijing Anzhen Hospital (24)                                 |
| Jiyan Chen, MD<br>Zhiming Ye, MD (N)                          | Haojian Dong<br>Peiyu He<br>Chunli Xia<br>Junqing Yang<br>Qi Zhong                             | Guangzhou | Guangdong General Hospital (15)                              |
| Xin Fu, MD<br>Zhangsuo Liu, MD (N)                            | Dan Gao<br>Dengke Jiang<br>Ran Leng<br>Xutong Wang<br>Qianqian Yuan<br>Lili Zhang              | Zhengzhou | The First Affiliated Hospital of Zhengzhou University (13)   |
| Shuyang Zhang, MD, PhD<br>Zhenyu Liu, MD<br>Xuemei Li, MD (N) | Ying Wang, MD<br>Yechen Han, MM<br>Lihong Xu, RN<br>Zhenyu Liu<br>Gang Chen, MD<br>Rongrong Hu | Beijing   | Peking Union Medical College Hospital (11)                   |
| Yitong Ma, MD (N)<br>Yining Yang, MD                          | Dongze Li<br>Xiaomei Li<br>Xiang Ma<br>Zixiang Yu<br>Qian Zhao                                 | Urumqi    | First Affiliated Hospital of Xinjiang Medical University (7) |
| Carlo Briguori, MD                                            | Francesca De Micco                                                                             | Naples    | Clinica Mediterranea (52)                                    |

**Italy (62)**

Lead Country Cardiologist

Francesco Orso, MD

|                                                                                              |                                                                   |        |                                                                                              |
|----------------------------------------------------------------------------------------------|-------------------------------------------------------------------|--------|----------------------------------------------------------------------------------------------|
| Gian Piero Perna, MD<br>Marco Marini, MD<br>Gabriele Gabrielli, MD<br>Mario D'arezzo, MD (N) | Francesca Pietrucci,<br>PhD                                       | Ancona | Cardiology and CCU - Ospedali Riuniti Ancona (7)                                             |
| Marco Sicuro, MD<br>Valentina Pellu, MD (N)                                                  | Gianpiero Leone, MD<br>Francesco Pisano, MD<br>Cristina Bare, BSc | Aosta  | Ospedale Regionale Umberto Parini (1)                                                        |
| Paolo Calabro, MD<br>Tiziana Formisano, MD<br>Piero Tassinario, MD (N)                       | Fabio Fimiani                                                     | Napoli | AORN Dei Colli "V. Monaldi"<br>UOC Cardiologia Università della Campania "L. Vanvitelli" (1) |
| Marcello Galvani, MD<br>Filippo Ottani, MD<br>Marco De Fabritis, MD (N)                      | Chiara Attanasio                                                  | Forli  | Ospedale "G.B. Morgagni – L. Pierantoni" Forli (AUSL della Romagna) (1)                      |

### Mexico (30)

Lead Country Cardiologist  
Jorge Escobedo, MD  
Lead Country Nephrologist  
Magdalena Madero, MD

|                                                                                                                                                                                                                                                            |                             |                 |                                                  |
|------------------------------------------------------------------------------------------------------------------------------------------------------------------------------------------------------------------------------------------------------------|-----------------------------|-----------------|--------------------------------------------------|
| Juan Manuel López Quijano, MD, MSc<br>Alejandro Chevaile Ramos, MD (N)<br>Jorge Carrillo Calvillo, MD                                                                                                                                                      | Teresa Delgadillo           | San Luis Potosi | Hospital Central Dr. Ignacio Morones Prieto (16) |
| Jorge Escobedo, MD<br>Rubén Baleón-Espinosa, MD<br>Arturo S Campos-Santaolalla, MD<br>Elihú Durán-Cortés, MD<br>José M Flores-Palacios, MD<br>Andrés García-Rincón, MD<br>Moisés Jiménez-Santos, MD<br>Joaquín V Peñafiel, MD<br>José A Ortega-Ramírez, MD | Ramon de Jesús-Pérez,<br>RN | Benito Juarez   | Instituto Mexicano del Seguro Social (10)        |

Aquiles Valdespino-Estrada, MD

|                                   |                    |             |                                                           |
|-----------------------------------|--------------------|-------------|-----------------------------------------------------------|
| Erick Alexánderson Rosas, MD      | María Pérez García | Mexico City | Instituto Nacional de Cardiología<br>"Ignacio Chávez" (2) |
| <u>Magdalena Madero, DM (N)</u>   |                    |             |                                                           |
| Guillermo Garcia-Garcia (N)       | Lorena Lopez, BS   | Guadalajara | Hospital Civil de Guadalajara<br>Fray Antonio Alcalde (2) |
| <u>Jonathan S. Chavez-Iñiguez</u> |                    |             |                                                           |

**Canada (24)**

Lead Country Cardiologists  
Akshay Bagai, MD, MHS  
Kevin R. Bainey, MD, MSc  
Lead Country Nephrologist  
Ron Wald, MDCM, MPH

|                                                                                                                                                                                                                 |                                                                                   |                       |                                                      |
|-----------------------------------------------------------------------------------------------------------------------------------------------------------------------------------------------------------------|-----------------------------------------------------------------------------------|-----------------------|------------------------------------------------------|
| Kevin R. Bainey, MD, MSc<br>Neesh Pannu, MD (N)                                                                                                                                                                 | Norma Hogg, RN<br>Suzanne Welsh, RN                                               | Edmonton, AB          | University of Alberta (15)                           |
| <u>Asim N. Cheema, MD, PhD</u>                                                                                                                                                                                  |                                                                                   |                       |                                                      |
| Akshay Bagai, MD, MHS<br>Ron Wald, MDCM, MPH (N)<br>Shaun Goodman, MD, MSc<br>John Joseph Graham, MRCP, MB<br>ChB, BSc<br>Mark Peterson, MD, FRCSC, PhD<br>Chi-Ming Chow, MD, CM, MSc<br>Beth Abramson, MD, MSc | Khrystyna Kushniriuk,<br>HBSc, MD<br>Mohammed Hussain<br>Olugbenga Bello          | Toronto, ON           | St. Michael's Hospital (3)                           |
| <u>Graham Wong, MD</u>                                                                                                                                                                                          |                                                                                   |                       |                                                      |
| Kenneth Gin, MD<br>Christopher Fordyce, MD                                                                                                                                                                      | Jackie Chow, BSN<br>Andrew Starovoytov, MD<br>Naomi Uchida, BSN<br>Ngairé Meadows | Vancouver, BC         | Vancouver General Hospital (2)                       |
| <u>Ariel Diaz, MD</u>                                                                                                                                                                                           |                                                                                   |                       |                                                      |
| Philippe Rheault, MD<br>Alejandro Gisbert, MD<br>Alain Raymond, MD<br>Yanek Pépin-Dubois, MD<br>Miguel Barrero, MD<br>Carl-Éric Gagné, MD<br>Mark Garand, MD<br>Ricardo Costa, MD<br>Catherine Lemay, MD        | Isabelle Roy, RN<br>Patricia Alarie, RN<br>Linda Arcand, RN<br>Estelle Montpetit  | Trois-Rivieres,<br>QC | Centre Hospitalier de Regional<br>Trois-Rivieres (1) |

|                                                                                                                                                                                                                                                                                   |                                                                |              |                                                                                                                                  |
|-----------------------------------------------------------------------------------------------------------------------------------------------------------------------------------------------------------------------------------------------------------------------------------|----------------------------------------------------------------|--------------|----------------------------------------------------------------------------------------------------------------------------------|
| Ying Tung Sia, MD<br>Pierre Gervais, MD<br>Alain Rheault, MD                                                                                                                                                                                                                      |                                                                |              |                                                                                                                                  |
| Pallav Garg, MBBS, MSc<br>Matthew Weir, MD (N)                                                                                                                                                                                                                                    | Sandy Carr, RN<br>Catherine Bone, RN                           | London, ON   | London Health Sciences Centre (1)                                                                                                |
| Amar Uxa, MD<br>Michael Farkouh, MD<br>Christopher Chan, MD (N)                                                                                                                                                                                                                   | Nadia Asif<br>Suzana Tavares                                   | Toronto, ON  | University Health Network (1)                                                                                                    |
| Philippe Généreux, MD<br><br>Jean Diodati, MD<br>François Madore, MD (N)                                                                                                                                                                                                          | Chantale Mercure, RN                                           | Montréal, QC | Centre Intégré Universitaire De Santé et de Services Sociaux du Nord de l'île de Montréal /Hôpital du Scaré-Cœur de Montréal (1) |
| Kian-Keong Poh, MD<br>Ping Chai, MD<br>Titus Lau, MD (N)<br>Joshua P. Loh, MD<br>Edgar L. Tay, MD<br>Kristine Teoh, MD<br>Lynette L. Teo, MD<br>Ching-Ching Ong, MD<br>Raymond C. Wong, MD<br>Poay-Huan Loh, MD<br>Theodoros Kofidis, MD<br>Wan Xian Chan, MD<br>Koo Hui Chan, MD | Sik-Yin V Tan, BSc<br>Winnie C Sia, BSc<br>Audrey W Leong, BSc | Singapore    | National University Heart Center Singapore (11)                                                                                  |
| David Foo, MBBS<br>Jason Loh Kwok Kong, MD<br>Ching Min Er, MD<br>Fahim Haider Jafary, MD<br>Tracy Tan, MD (N)                                                                                                                                                                    | Li Hai Yan, RN                                                 | Singapore    | Tan Tock Seng Hospital (2)                                                                                                       |

**Singapore (14)**

Lead Country Cardiologist  
Kian-Keong Poh, MD  
Lead Country Nephrologist  
Titus Lau, MD



|                   |                                              |           |                                        |
|-------------------|----------------------------------------------|-----------|----------------------------------------|
| Terrance Chua, MD | Nasrul Ismail<br>Min Tun Kyaw<br>Deborah Yip | Singapore | National Heart Centre Singapore<br>(1) |
|-------------------|----------------------------------------------|-----------|----------------------------------------|

**Brazil (13)**

Lead Country Cardiologist

Renato D. Lopes, MD, PhD

Lead Country Nephrologists

Maria Eugenia Canziani, MD (Lead)

Sergio Draibe, MD (Co-Lead)

|                                                                                                                                              |                         |           |                                                        |
|----------------------------------------------------------------------------------------------------------------------------------------------|-------------------------|-----------|--------------------------------------------------------|
| Whady Hueb, MD<br>Eduardo Gomes Lima, MD<br>Paulo Cury Rezende, MD<br>Expedito Eustáquio Ribeiro Silva,<br>MD<br>Alexandre Ciappina Hueb, MD | Myrthes Emy Takiuti, RN | Sao Paulo | Heart Institute (InCor) University<br>of São Paulo (6) |
|----------------------------------------------------------------------------------------------------------------------------------------------|-------------------------|-----------|--------------------------------------------------------|

|                                                                                                 |                        |          |                       |
|-------------------------------------------------------------------------------------------------|------------------------|----------|-----------------------|
| Marianna D. A. Dracoulakis, MD,<br>PhD<br>Rodolfo G. S. D Lima, MD<br>Paulo Novis Rocha, MD (N) | Natalia S Oliveira, RN | Salvador | Hospital da Bahia (5) |
|-------------------------------------------------------------------------------------------------|------------------------|----------|-----------------------|

|                                                                                                                                                                                                                                          |                                                                                                                                   |              |                                                 |
|------------------------------------------------------------------------------------------------------------------------------------------------------------------------------------------------------------------------------------------|-----------------------------------------------------------------------------------------------------------------------------------|--------------|-------------------------------------------------|
| Alexandre Schaan de Quadros,<br>MD<br>Renato Abdala Karam Kalil, MD<br>José Luiz da Costa Vieira, MD<br>Gabriel Grossmann, MD<br>Pedro Píccaro de Oliveira, MD<br>Leonardo Bridi, MD<br>Simone Savaris, MD<br>Renato George Eick, MD (N) | Aline Peixoto Deiro<br>Alice Manica Muller<br>Maria Antonieta Pereira<br>de Moraes<br>Bruna Maria Ascoli<br>Sílvia Zottis Poletti | Porto Alegre | Instituto de Cardiologia de Porto<br>Alegre (1) |
|------------------------------------------------------------------------------------------------------------------------------------------------------------------------------------------------------------------------------------------|-----------------------------------------------------------------------------------------------------------------------------------|--------------|-------------------------------------------------|

|                                                                      |                                 |           |                                                 |
|----------------------------------------------------------------------|---------------------------------|-----------|-------------------------------------------------|
| Paola Emanuela Poggio Smanio,<br>MD, PhD<br>Leda Lotaif, MD, PhD (N) | Leonardo Pizzol<br>Caetano, PhD | São Paulo | Instituto Dante Pazzanese de<br>Cardiologia (1) |
|----------------------------------------------------------------------|---------------------------------|-----------|-------------------------------------------------|

**Hungary (12)**

Lead Country Cardiologist

Andras Vertes, MD

Lead Country Nephrologist

Peter Voros, MD

|                                                       |                                                               |          |                                                         |
|-------------------------------------------------------|---------------------------------------------------------------|----------|---------------------------------------------------------|
| Andras Vertes, MD<br>Peter Voros, MD (N)              | Judit Sebo, MD<br>Zoltan Davidovits, MD<br>Laszlong Matics    | Budapest | Eszszk- Szent Istvan Hospital<br>(10)                   |
| Bela Merkely, MD, PhD, DSc<br>Mihaly Tapolyai, MD (N) | Andrea Bartykowszki, MD<br>Pal Maurovich-Horvat, MD, PhD, MPH | Budapest | Heart and Vascular Center,<br>Semmelweis University (1) |
| Albert Varga, MD, PhD<br>Timea Boros, MD (N)          | Gergely Agoston, MD                                           | Szeged   | University of Szeged (1)                                |

**Lithuania (12)**

Lead Country Cardiologist  
Jelena Celutkiene, MD  
Lead Country Nephrologist  
Marius Miglinas, MD, PhD

|                                                                                 |                                                                                                                                                                                                          |         |                                                        |
|---------------------------------------------------------------------------------|----------------------------------------------------------------------------------------------------------------------------------------------------------------------------------------------------------|---------|--------------------------------------------------------|
| Aleksandras Laucevicius, MD<br>Jelena Celutkiene, MD<br>Marius Miglinas, MD (N) | Agne Juceviciene, MD<br>Irma Kalibataite-<br>Rutkauskiene, MD<br>Laura Keinaite<br>Monika Laukyte<br>Gelmina Mikolaitiene<br>Akvile Smigelskaite, MD<br>Ilona Tamasauskiene,<br>MD<br>Agne Urboniene, MD | Vilnius | Vilnius University Hospital<br>Santariskes Clinic (12) |
|---------------------------------------------------------------------------------|----------------------------------------------------------------------------------------------------------------------------------------------------------------------------------------------------------|---------|--------------------------------------------------------|

**Portugal (10)**

Lead Country Cardiologist  
Ruben Ramos, MD  
Lead Country Nephrologist  
Fernando Nolasco, PhD

|                                                                                                                                                                     |                                                 |        |                                                        |
|---------------------------------------------------------------------------------------------------------------------------------------------------------------------|-------------------------------------------------|--------|--------------------------------------------------------|
| Ruben Ramos, MD<br>Duarte Cabela, MD<br>Ana Santana, MD<br>Antonio Fiarresga, MD<br>Lidia Sousa, MD<br>Hugo Marques, MD<br>Lino Patricio, MD<br>Luis Bernarndes, MD | Mafalda Selas<br>Filipa Silva<br>Cláudia Freixo | Lisbon | Hospital de Santa Marta /<br>Hospital Curry Cabral (8) |
|---------------------------------------------------------------------------------------------------------------------------------------------------------------------|-------------------------------------------------|--------|--------------------------------------------------------|

Pedro Rio, MD  
 Ramiro Carvalho, MD  
 Rui Ferreira, MD  
 Tiago Silva, MD  
 Ines Rodrigues, MD  
 Pedro Modas, MD  
 Guilherme Portugal, MD  
 Jose Fragata, MD  
 Marina Vieira, MD  
 Fernando Nolasco, PhD (N)  
 Marina Vieira., MD  
 Fernando Caeiro, MD

---

|                                                                                                                    |                            |         |                                                        |
|--------------------------------------------------------------------------------------------------------------------|----------------------------|---------|--------------------------------------------------------|
| Pedro Farto e Abreu, MD<br>Sérgio Bravo Baptista, MD, PhD<br>Miguel Borges Santos, MD<br>Patricia Carrilho, MD (N) | Maura Carina Nédio,<br>BSc | Amadora | Hospital Professor Doutor<br>Fernando Fonseca, EPE (1) |
|--------------------------------------------------------------------------------------------------------------------|----------------------------|---------|--------------------------------------------------------|

---

|                                                                                                                                                                                                           |                                                                                                                                                                           |        |                                                                        |
|-----------------------------------------------------------------------------------------------------------------------------------------------------------------------------------------------------------|---------------------------------------------------------------------------------------------------------------------------------------------------------------------------|--------|------------------------------------------------------------------------|
| Fausto J. Pinto, PhD<br>Miguel Nobre Menezes, MD<br>Guilhermina Cantinho Lopes, MD<br>Ana Gomes Almeida, PhD<br>Pedro Canas Silva, MD<br>Angelo Nobre, MD<br>Ana Rita Francisco, MD<br>Jose Lopes, MD (N) | Inês Zimbarra Cabrita,<br>PhD<br>Andreia Rocha, MSc<br>Francisca Patuleia<br>Figueiras, PhD<br>Andreia Coelho, BSc<br>Marta Capinha<br>Maria Inês Caetano<br>Susana Silva | Lisbon | Santa Maria University Hospital,<br>Cardiology Department, CHLN<br>(1) |
|-----------------------------------------------------------------------------------------------------------------------------------------------------------------------------------------------------------|---------------------------------------------------------------------------------------------------------------------------------------------------------------------------|--------|------------------------------------------------------------------------|

**Spain (9)**

Lead Country Cardiologist  
 Almudena Castro, MD  
 Lead Country Nephrologist  
 Rafael Selgas, MD

---

|                                                                                                                                                    |                                       |        |                             |
|----------------------------------------------------------------------------------------------------------------------------------------------------|---------------------------------------|--------|-----------------------------|
| Jose Lopez-Sendon, MD, PhD<br>Almudena Castro, MD<br>Elena Refoyo Salicio, MD<br>Gabriela Guzman, MD<br>Gabriel Galeote, MD<br>Silvia Valbuena, MD | Virginia Fernández-<br>Figares, Pharm | Madrid | Hospital La Paz. IdiPaz (6) |
|----------------------------------------------------------------------------------------------------------------------------------------------------|---------------------------------------|--------|-----------------------------|

Rafael Selgas, MD (N)

---

|                                 |                                 |          |                                                                                                                                                      |
|---------------------------------|---------------------------------|----------|------------------------------------------------------------------------------------------------------------------------------------------------------|
| Jesús Peteiro, MD, PhD          | Moisés Blanco-Calvo, PhD        | A Coruna | Complejo Hospitalario Universitario A Coruña (CHUAC) Sergas, Department of Cardiology. INIBIC A Coruña. CIBER-CV. Universidad de A Coruña, Spain (2) |
| María Dolores Martínez-Ruíz, MD | Encarnación Alonso-Álvarez, BSc |          |                                                                                                                                                      |
| Ruth Pérez-Fernández, MD        | Paula García-González, BSc      |          |                                                                                                                                                      |
| José J Cuenca-Castillo, MD      |                                 |          |                                                                                                                                                      |
| Xacobe Flores-Ríos, MD          |                                 |          |                                                                                                                                                      |
| Óscar Prada-Delgado, MD         |                                 |          |                                                                                                                                                      |
| Gonzalo Barge-Caballero, MD     |                                 |          |                                                                                                                                                      |
| Miguel Perez Fontan, MD (N)     |                                 |          |                                                                                                                                                      |

---

|                               |                  |          |                                                |
|-------------------------------|------------------|----------|------------------------------------------------|
| Vicente Miro, MD              | Begoña Igual, MD | Valencia | Hospital Universitario y Politecnico La Fe (1) |
| Jose L Diez, MD               |                  |          |                                                |
| Pilar Calvillo, MD            |                  |          |                                                |
| Julio Hernandez Jaras, MD (N) |                  |          |                                                |

**Argentina (6)**

Lead Country Cardiologist  
Luis Guzman, MD  
Lead Country Nephrologist  
Rafael Maldonado, MD

---

|                          |                    |         |                                     |
|--------------------------|--------------------|---------|-------------------------------------|
| Mariano Rubio, MD        | Graciela Scaro, MD | Cordoba | Clínica Privada Vélez Sarsfield (5) |
| Rafael Maldonado, MD (N) |                    |         |                                     |

---

|                           |                      |                                 |                        |
|---------------------------|----------------------|---------------------------------|------------------------|
| Julio César Figal, MD     | Matías Nicolás Mungo | Ciudad Autónoma de Buenos Aires | Fundación Favaloro (1) |
| Oscar Méndiz, MD          |                      |                                 |                        |
| Claudia Cortés, MD        |                      |                                 |                        |
| Roberto René Favaloro, MD |                      |                                 |                        |
| Pablo Raffaele, MD (N)    |                      |                                 |                        |

**France (6)**

Lead Country Cardiologist  
Emmanuel Sorbets, MD, PhD  
Lead Country Nephrologist

Eric Daugas, MD, PhD

|                                                                                                               |                                            |       |                     |
|---------------------------------------------------------------------------------------------------------------|--------------------------------------------|-------|---------------------|
| Philippe Gabriel Steg, MD<br>Jean-Michel Juliard, MD<br>Eric Daugas, MD, PhD (N)<br>Emmanuel Sorbets, MD, PhD | Helene Abergel, MSc<br>Axelle Fuentes, MSc | Paris | Bichat Hospital (4) |
|---------------------------------------------------------------------------------------------------------------|--------------------------------------------|-------|---------------------|

---

|                                                                                                        |                                                                                            |          |                        |
|--------------------------------------------------------------------------------------------------------|--------------------------------------------------------------------------------------------|----------|------------------------|
| Christophe Thuaire, MD<br>Téodora Dutoiu, MD<br>Catherine Albert, MD (N)<br>Bougrida Hammouche, MD (N) | Corine Thobois, RN<br>Emilie Tachot, RN<br>Christophe Laure, RN<br>Christel Vassaliere, RN | Chartres | C.H. Louis Pasteur (2) |
|--------------------------------------------------------------------------------------------------------|--------------------------------------------------------------------------------------------|----------|------------------------|

---

**New Zealand (6)**

Lead Country Cardiologist  
Gerard Patrick Devlin, MD  
Lead Country Nephrologist  
Peter Sizeland, MD

|                                                                          |                                                           |          |                      |
|--------------------------------------------------------------------------|-----------------------------------------------------------|----------|----------------------|
| Gerard Patrick Devlin, MD<br>Raewyn Fisher, MD<br>Peter Sizeland, MD (N) | Liz Low, RN<br>Jayne Scales, RN<br>Kirsty Abercrombie, RN | Hamilton | Waikato Hospital (6) |
|--------------------------------------------------------------------------|-----------------------------------------------------------|----------|----------------------|

**United Kingdom (5)**

Lead Country Nephrologist  
David Wheeler, MD

|                                                                                                                                                                                                                                                                                                                                   |                                                                                                                                                                                                                                                                                    |        |                                                                       |
|-----------------------------------------------------------------------------------------------------------------------------------------------------------------------------------------------------------------------------------------------------------------------------------------------------------------------------------|------------------------------------------------------------------------------------------------------------------------------------------------------------------------------------------------------------------------------------------------------------------------------------|--------|-----------------------------------------------------------------------|
| Roxy Senior, MBBS, MD, DM<br>Ahmed Elghamaz, MB BCh<br>Sothinathan Gurunathan, MBChB<br>Nikolaos Karogiannis, MBBS<br>Benoy N Shah, MD, MBBS, BSc (Hons)<br>Richard HJ Trimlett, MBBS, CCST<br>Michael B Rubens, LRCP, MRCS, MBBS, DMRD<br>Edward D Nicol, MD, BMedSci, MBBS, DTM&H<br>Tarun K Mittal, MD<br>Neill Duncan, MD (N) | Grace M. Young, MSc, BSc (Hons)<br>Christopher Kinsey<br>Raisa Kavalakkat, MSc, BSc, RN<br>Jo Evans, RN<br>Ikraam Hassan, RN<br>Emma Howard, MSc, BSc<br>Ann Banfield, BSc, RN<br>Reinette Hampson, BSc (Hons), BA (Hons)<br>Rory Collins, BSc<br>Anastasia Vamvakidou, MBBS, MRCP | Harrow | Northwick Park Hospital Harrow/<br>Royal Brompton Hospital London (2) |
|-----------------------------------------------------------------------------------------------------------------------------------------------------------------------------------------------------------------------------------------------------------------------------------------------------------------------------------|------------------------------------------------------------------------------------------------------------------------------------------------------------------------------------------------------------------------------------------------------------------------------------|--------|-----------------------------------------------------------------------|

|                                                                          |                                                                             |            |                                               |
|--------------------------------------------------------------------------|-----------------------------------------------------------------------------|------------|-----------------------------------------------|
| Reto Andreas Gamma, MBBS<br>Sumith Abeygunasekara, MD (N)                | Sarah Williams, RN<br>Kim Holland, RN<br>Karen Swan, RN                     | Chelmsford | Broomfield Hospital (1)                       |
| Khaled Alfakih, MBBS, MD<br>Jonathan Byrne, PhD<br>Ian Webb, PhD, MA (N) | Abigail Knighton, BSc.,<br>PG Dip.<br>Katherine Martin, RGN,<br>Dip. N, MSc | London     | King's College NHS Foundation<br>Hospital (1) |
| Dwayne S. G. Conway, MD                                                  | Judith Wright<br>Donna Exley                                                | Wakefield  | Pinderfields Hospital (1)                     |

#### **Serbia (5)**

Lead Country Cardiologist  
Branko D. Beleslin, MD, PhD  
Lead Country Cardiologist  
Sanja Simic Ogrizovic, MD

|                                                                                      |                                     |          |                                                                                                     |
|--------------------------------------------------------------------------------------|-------------------------------------|----------|-----------------------------------------------------------------------------------------------------|
| Branko D. Beleslin, MD, PhD                                                          |                                     | Belgrade | Faculty of Medicine, University of<br>Belgrade; Cardiology Clinic,<br>Clinical Center of Serbia (5) |
| Nikola N. Boskovic, MD                                                               | Ana D. Djordjevic-Dikic,<br>MD, PhD |          |                                                                                                     |
| Marija T. Petrovic, MD                                                               | Vojislav L. Giga, MD,<br>PhD        |          |                                                                                                     |
| Milan R. Dobric, MD                                                                  | Jelena J. Stepanovic,<br>MD, PhD    |          |                                                                                                     |
| Zeljko Z. Markovic, MD, PhD<br>Ana S. Mladenovic, MD, PhD<br>Sanja Ogrizovic, MD (N) |                                     |          |                                                                                                     |

#### **Australia (4)**

Lead Country Cardiologist  
Joseph B. Selvanayagam, MBBS (Hons), Dphil  
Lead Country Cardiologist  
Magid Fahim, MBChB,  
FRACP

|                                                                            |                                                                                                                       |                                   |           |                                                                       |
|----------------------------------------------------------------------------|-----------------------------------------------------------------------------------------------------------------------|-----------------------------------|-----------|-----------------------------------------------------------------------|
| <b>Austria (4)</b><br>Lead Country Cardiologist<br>Herwig Schuchlenz       | Joseph B. Selvanayagam, MBBS(Hons), DPhil<br>Majo X. Joseph, MBBS<br>Jonathan M Gleadle, BM Dphil (N)                 | Sau Lee, PhD<br>Prince Thomas, RN | Adelaide  | Flinders Medical Centre and College of Medicine and Public Health (4) |
|                                                                            | Herwig Schuchlenz, MD<br>Stefan Weikl, MD                                                                             | Gudrun Steinmaurer                | Graz      | LKH Graz West Austria (3)                                             |
| <b>Belgium (4)</b><br>Lead Country Nephrologist<br>Kathleen Claes, MD, PhD | Irene Marthe Lang, MD                                                                                                 | Max-Paul Winter, MD               | Vienna    | Medical University of Vienna, Department of Cardiology (1)            |
|                                                                            | Kaatje Goetschalckx, MD<br>Frans Van de Werf, PhD, MD<br>Kathleen Claes, MD, PhD (N)                                  | Valerie Robesyn                   | Leuven    | University Hospital Leuven (3)                                        |
| <b>Israel (4)</b>                                                          | Christiaan Vrints, MD<br>Bharati Shivalkar, MD<br>Amaryllis Van Craenenbroeck, MD (N)                                 | Nathalie Brosens                  | Edegem    | Universitair Ziekenhuis Antwerpen (1)                                 |
|                                                                            | Yaron Arbel, MD<br>Doron Schwartz, MD (N)<br>Orit Kliuk, MD                                                           | Daniela Puzhevsky<br>Miri Revivo  | Tel Aviv  | Tel Aviv Sourasky Medical Center (4)                                  |
| <b>Egypt (3)</b>                                                           | Magdy Abdelhamid, MD<br>Ahmed Kamal, MsC<br>Hossam Mahrous, MD<br>Mohamed Adel , MsC<br>Hussien El Fishawy, MD (N)    | Ahmed Talaat, MD                  | Cairo     | Cairo University (3)                                                  |
| <b>United Arab Emirates (2)</b>                                            | Wael A. Almahmeed, MD<br>Mohamed Hassan, MD (N)<br>Seema Nour, MD<br>Abdallah M. Abdallah, MD<br>Salamah Alfalahi, MD | Virendra Misra, MD                | Abu Dhabi | Sheikh Khalifa Medical City (2)                                       |

**Germany (1)**

Lead Country Cardiologist  
Rolf Doerr, MD

Rolf Doerr, MD

Karin Ploetze, PhD

Dresden

Praxisklinik Herz und Gefaesse  
(1)

Gregor Simonis, MD, PhD  
Juergen Stumpf, MD  
Clemens T. Kadalie, MD  
Klaus Matschke, MD, PhD  
Doreen Reimann, MD (N)

Franziska Guenther  
Kerstin Bonin  
Kerstin Mikes, RN  
Katharina Knaut

**Macedonia (1)**

Sasko Kedev, MD, PhD  
Irena Peovska Mitevska, MD, PhD  
Elizabeta Srbinovska Kostovska, MD, PhD  
Hristo Pejkov, MD, PhD  
Zvezdana Petronijevic, MD (N)  
Liljana Tozija, MD (N)

Skopje

University Clinic of Cardiology (1)

**Netherlands (1)**

Robert K. Riezebos, MD, PhD

Amsterdam

Cardio Research Hartcentrum  
OLVG (1)

Pouneh Samadi, MD

Jeannette, J. M. Schoep,  
RN  
Elisabeth, M. Janzen,  
RN

Elise van Dongen, MD

Sander R. Niehe, MD  
Yves Smets, MD (N)

**Romania (1)**

Calin Pop, MD, PhD

Bucharest

Emergency County Hospital Baia  
Mare (1)

Matei Claudia, MD, PhD  
Florina Chereches, MD (N)

**Sweden (1)**

Lead Country Cardiologist  
Claes Held, MD, PhD

Claes Held, MD, PhD  
Axel Åkerblom, MD, PhD  
Inga Soveri, MD, PhD (N)

Christina Björklund, RN  
Maria Andreasson, RN

Uppsala

Uppsala University (1)

\* (N) = Nephrologist



### 3 Supplemental Figure 1: Consort Diagram of Patient Flow

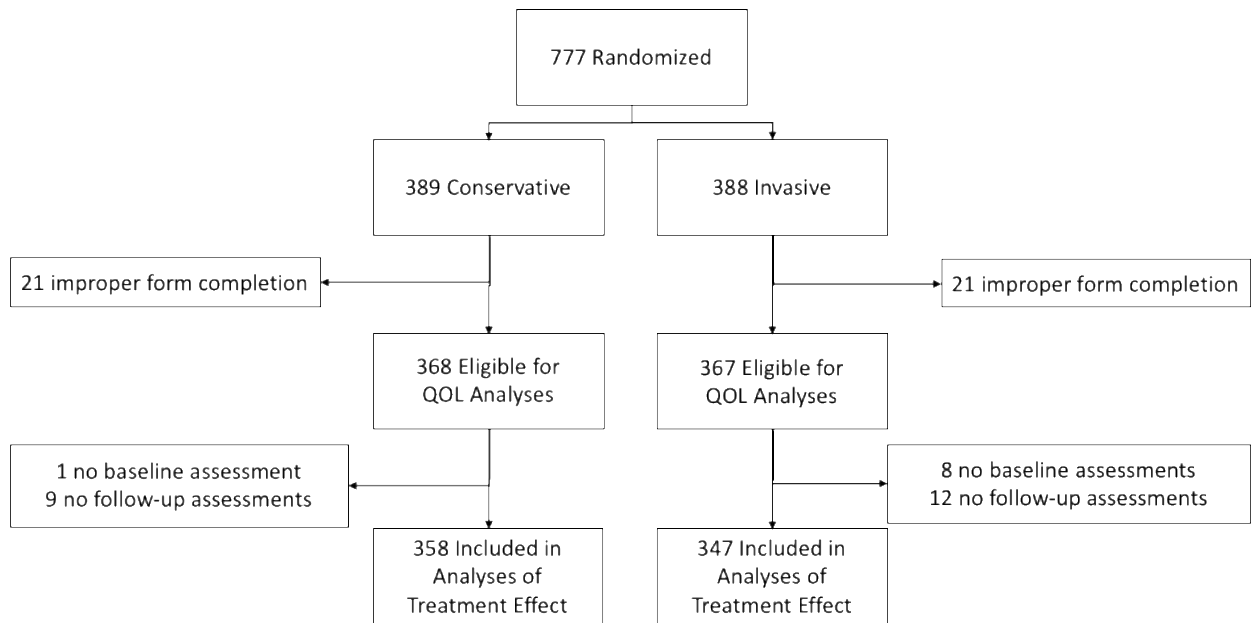

4 Supplemental Figure 2 – Posterior Distributions of Treatment Effect on Seattle Angina Questionnaire Summary Scores for a Typical Patient

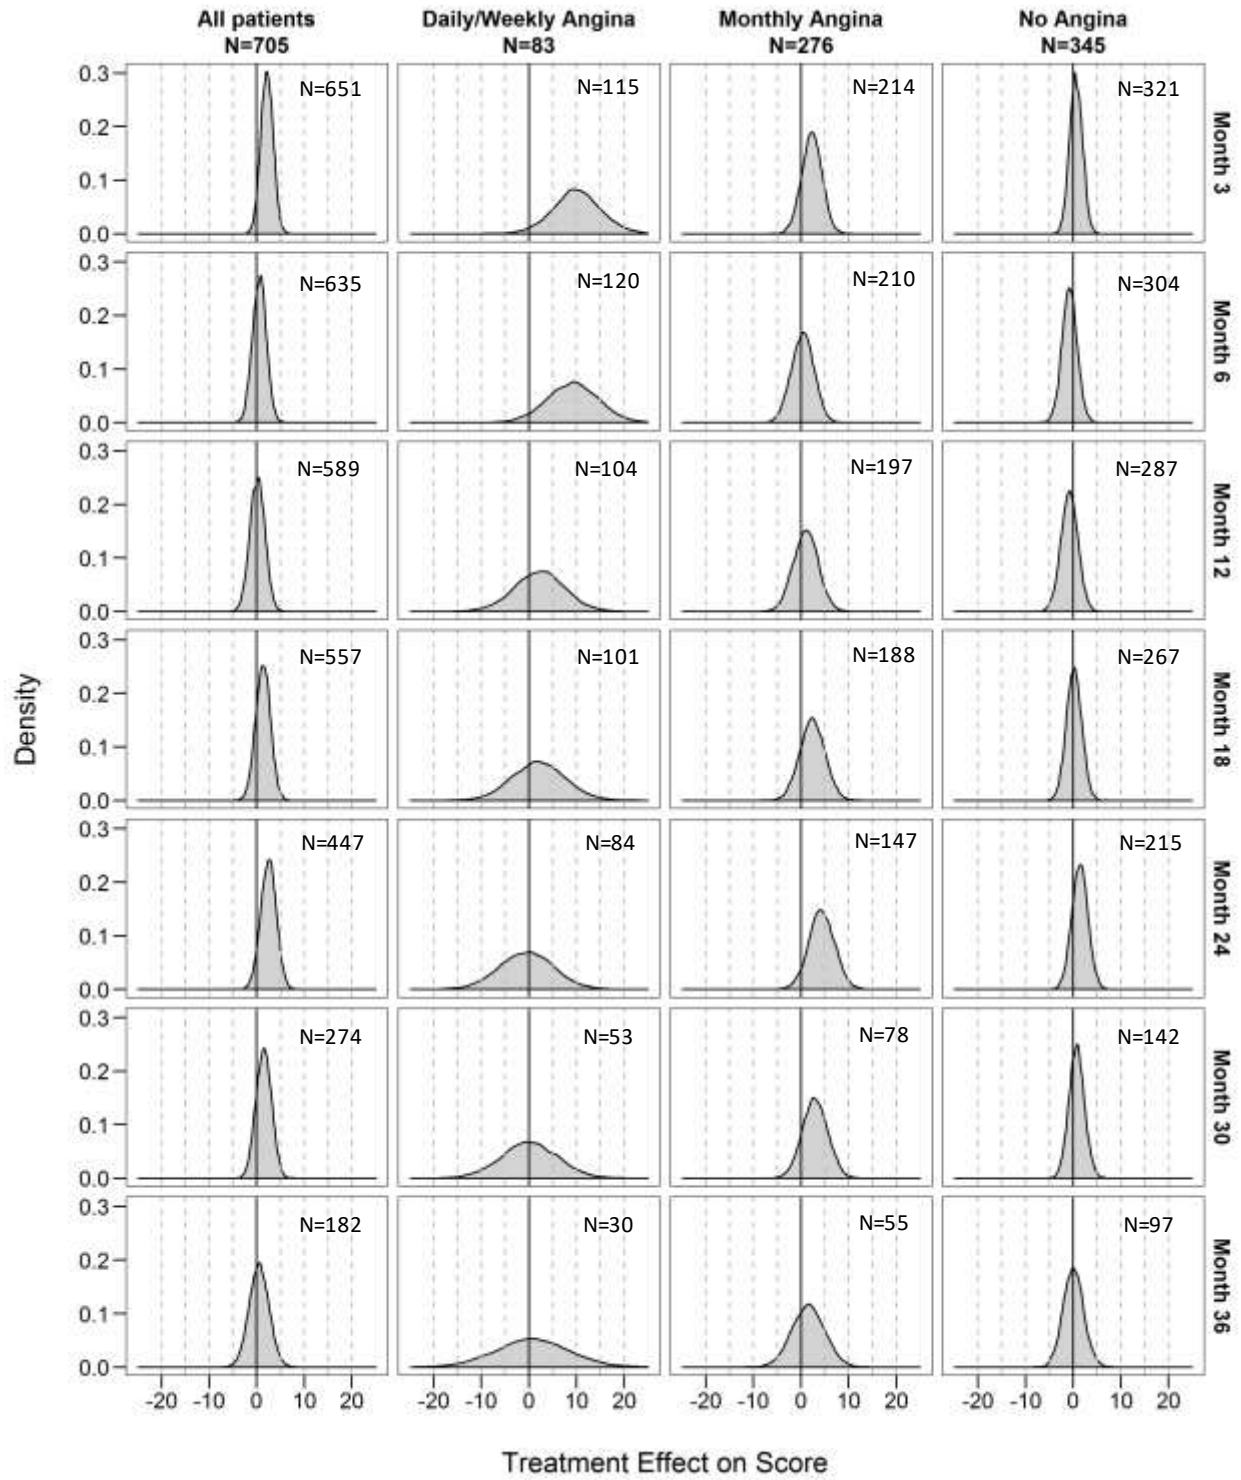

**5 Supplemental Figure 3: Posterior Distribution of ORs for Main and CKD Trials:** We plotted each randomly sampled pair ( $n=20,000$ ) of the posterior distributions of ORs for a treatment benefit from ISCHEMIA-CKD (y-axis) and ISCHEMIA (x-axis). The narrow distributions in ISCHEMIA reflect the larger sample size. The proportions of pairs below the line of unity reflect the confidence of a larger treatment benefit in the ISCHEMIA compared with ISCHEMIA-CKD.

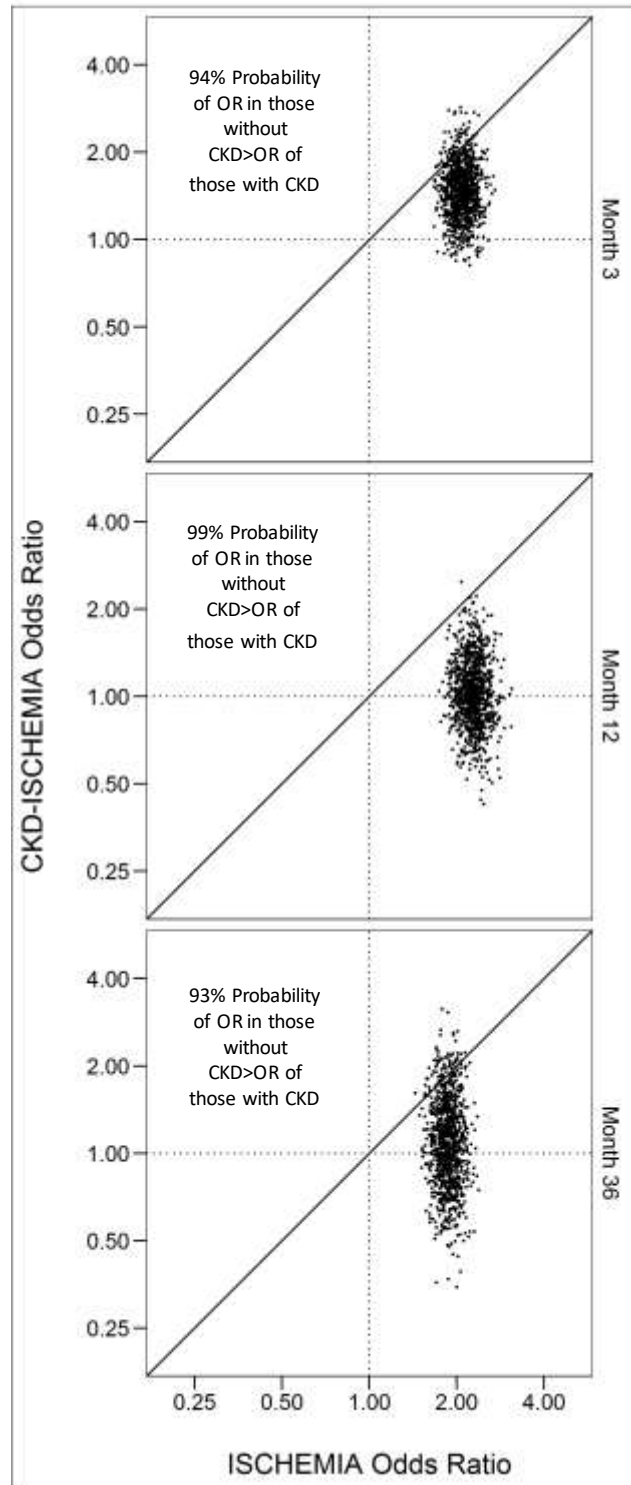

**6 Supplemental Table 1: Clinical Differences between Participants (n=705) and those excluded for missing either a baseline or all follow-up health status assessments (n=30)**

|                                           | Included<br>n = 705 | Excluded<br>n = 30 | P-Value |
|-------------------------------------------|---------------------|--------------------|---------|
| Randomized Treatment                      |                     |                    | 0.061   |
| Invasive                                  | 347 (49.2%)         | 20 (66.7%)         |         |
| Conservative                              | 358 (50.8%)         | 10 (33.3%)         |         |
| Age at Randomization                      |                     |                    | 0.495   |
| Mean ± SD                                 | 62.7 ± 10.9         | 61.3 ± 9.8         |         |
| Sex                                       |                     |                    | 0.608   |
| Male                                      | 478 (67.8%)         | 19 (63.3%)         |         |
| Female                                    | 227 (32.2%)         | 11 (36.7%)         |         |
| Race                                      |                     |                    | 0.213   |
| American Indian or Alaska Native          | 5 (0.7%)            | 0 (0.0%)           |         |
| Asian                                     | 145 (21.4%)         | 4 (15.4%)          |         |
| Native Hawaiian or Other Pacific Islander | 6 (0.9%)            | 0 (0.0%)           |         |
| Black or African American                 | 57 (8.4%)           | 6 (23.1%)          |         |
| White                                     | 465 (68.5%)         | 16 (61.5%)         |         |
| Mulpital Races                            | 1 (0.1%)            | 0 (0.0%)           |         |
| Missing                                   | 26                  | 4                  |         |
| Ethnicity                                 |                     |                    | 0.693   |
| Hispanic or Latino                        | 91 (12.9%)          | 5 (16.7%)          |         |
| Not Hispanic or Latino                    | 575 (81.6%)         | 23 (76.7%)         |         |
| Unknown                                   | 39 (5.5%)           | 2 (6.7%)           |         |
| Hypertension                              |                     |                    | 1.000   |
| No                                        | 45 (6.4%)           | 1 (3.3%)           |         |
| Yes                                       | 656 (93.0%)         | 29 (96.7%)         |         |
| Unknown                                   | 4 (0.6%)            | 0 (0.0%)           |         |
| Diabetes                                  | 385 (54.6%)         | 20 (66.7%)         | 0.193   |
| Prior MI                                  |                     |                    | 0.813   |
| No                                        | 580 (82.3%)         | 26 (86.7%)         |         |
| Yes                                       | 124 (17.6%)         | 4 (13.3%)          |         |
| Unknown                                   | 1 (0.1%)            | 0 (0.0%)           |         |
| Baseline Smoking Status                   |                     |                    | 0.492   |
| Never Smoked                              | 334 (47.4%)         | 15 (50.0%)         |         |
| Former Smoker                             | 295 (41.8%)         | 10 (33.3%)         |         |
| Current Smoker                            | 76 (10.8%)          | 5 (16.7%)          |         |
| CCS Angina Class                          |                     |                    | 0.404   |
| None                                      | 278 (39.5%)         | 12 (40.0%)         |         |
| I                                         | 147 (20.9%)         | 5 (16.7%)          |         |
| II                                        | 251 (35.7%)         | 10 (33.3%)         |         |
| III                                       | 28 (4.0%)           | 3 (10.0%)          |         |
| Missing                                   | 1                   |                    |         |
| New Onset Angina Within 3 Months          | 111 (16.4%)         | 4 (13.8%)          | 1.000   |
| Missing                                   | 28                  | 1                  |         |
| Heart Failure                             | 372 (52.8%)         | 18 (60.0%)         | 0.436   |

|                                  | Included<br>n = 705 | Excluded<br>n = 30 | P-Value |
|----------------------------------|---------------------|--------------------|---------|
| Current NYHA Heart Failure Class |                     |                    | 0.085   |
| I                                | 130 (34.9%)         | 2 (11.1%)          |         |
| II                               | 241 (64.8%)         | 16 (88.9%)         |         |
| III                              | 1 (0.3%)            | 0 (0.0%)           |         |
| Missing                          | 333                 | 12                 |         |
| Prior Cerebrovascular Disease    | 95 (13.5%)          | 5 (16.7%)          | 0.587   |
| Missing                          | 1                   |                    |         |
| Prior Stroke                     | 64 (9.1%)           | 4 (13.3%)          | 0.512   |
| Peripheral Vascular Disease      | 48 (6.8%)           | 0 (0.0%)           | 0.251   |
| History of Depression            |                     |                    | 0.489   |
| No                               | 660 (93.6%)         | 27 (90.0%)         |         |
| Yes                              | 42 (6.0%)           | 3 (10.0%)          |         |
| Unknown                          | 3 (0.4%)            | 0 (0.0%)           |         |
| Baseline BMI (kg/m)              |                     |                    | 0.447   |
| Mean ± SD                        | 28.2 ± 6.0          | 27.3 ± 6.2         |         |
| Missing                          | 3                   | 1                  |         |
| Stress Test: Degree of Ischemia  |                     |                    | 0.364   |
| Moderate                         | 443 (63.5%)         | 16 (55.2%)         |         |
| Severe                           | 255 (36.5%)         | 13 (44.8%)         |         |
| Missing                          | 7                   | 1                  |         |
| Stress Test Modality             |                     |                    | 0.830   |
| Nuclear (PET/SPECT)              | 448 (63.6%)         | 18 (62.1%)         |         |
| Echocardiographic Stress         | 140 (19.9%)         | 5 (17.2%)          |         |
| Cardiac Magnetic Resonance       | 1 (0.1%)            | 0 (0.0%)           |         |
| ETT without Imaging              | 115 (16.3%)         | 6 (20.7%)          |         |
| Missing                          | 1                   | 1                  |         |
| Anterior Ischemia                | 5 (14.7%)           | 0 (0.0%)           | 1.000   |
| Missing                          | 671                 | 28                 |         |
| SAQ Summary Score                |                     |                    | < 0.001 |
| Mean ± SD                        | 76.4 ± 19.2         | 58.2 ± 27.0        |         |
| Median (IQR)                     | 79.0 (63.0, 94.0)   | 62.5 (35.5, 77.5)  |         |
| Missing                          | 1                   | 10                 |         |
| SAQ Physical Limitation Score    |                     |                    | 0.030   |
| Mean ± SD                        | 75.0 ± 25.1         | 59.7 ± 28.4        |         |
| Median (IQR)                     | 83.0 (58.0, 100.0)  | 50.0 (42.0, 83.0)  |         |
| Missing                          | 143                 | 17                 |         |
| SAQ Angina Frequency Score       |                     |                    | < 0.001 |
| Mean ± SD                        | 87.3 ± 17.4         | 70.0 ± 31.5        |         |
| Median (IQR)                     | 90.0 (80.0, 100.0)  | 80.0 (45.0, 100.0) |         |
| Missing                          | 1                   | 10                 |         |
| SAQ Quality of Life Score        |                     |                    | < 0.001 |
| Mean ± SD                        | 66.6 ± 27.5         | 42.7 ± 29.6        |         |
| Median (IQR)                     | 75.0 (50.0, 88.0)   | 50.0 (13.0, 62.5)  |         |
| Missing                          | 2                   | 10                 |         |

**7 Supplemental Table 2. Brief Symptom Questionnaire Completion Rates and Reasons for Missingness**

| Month                                              | Number of Patients Who... |                                          |                              | Completed   | Skipped    | Withdrawn | Lost to Follow-up |
|----------------------------------------------------|---------------------------|------------------------------------------|------------------------------|-------------|------------|-----------|-------------------|
|                                                    | Died                      | Were Censored Due to Completion of Trial | Were Eligible for Assessment |             |            |           |                   |
| <b><i>Conservative Treatment Group (N=368)</i></b> |                           |                                          |                              |             |            |           |                   |
| 0                                                  | 0                         | 0                                        | 368                          | 367 (99.7%) | 1 ( 0.3%)  | 0 ( 0.0%) | 0 ( 0.0%)         |
| 1.5                                                | 7                         | 0                                        | 361                          | 331 (91.7%) | 28 ( 7.8%) | 0 ( 0.0%) | 2 ( 0.6%)         |
| 3                                                  | 16                        | 0                                        | 352                          | 317 (90.1%) | 33 ( 9.4%) | 0 ( 0.0%) | 2 ( 0.6%)         |
| 6                                                  | 20                        | 0                                        | 348                          | 316 (90.8%) | 26 ( 7.5%) | 0 ( 0.0%) | 6 ( 1.7%)         |
| 12                                                 | 35                        | 0                                        | 333                          | 296 (88.9%) | 29 ( 8.7%) | 0 ( 0.0%) | 8 ( 2.4%)         |
| 18                                                 | 50                        | 1                                        | 317                          | 284 (89.6%) | 23 ( 7.3%) | 0 ( 0.0%) | 10 ( 3.2%)        |
| 24                                                 | 65                        | 50                                       | 253                          | 221 (87.4%) | 22 ( 8.7%) | 0 ( 0.0%) | 10 ( 4.0%)        |
| 30                                                 | 72                        | 124                                      | 172                          | 146 (84.9%) | 15 ( 8.7%) | 0 ( 0.0%) | 11 ( 6.4%)        |
| 36                                                 | 81                        | 175                                      | 112                          | 98 (87.5%)  | 7 ( 6.3%)  | 0 ( 0.0%) | 7 ( 6.3%)         |
| 42                                                 | 88                        | 228                                      | 52                           | 45 (86.5%)  | 3 ( 5.8%)  | 0 ( 0.0%) | 4 ( 7.7%)         |
| 48                                                 | 88                        | 255                                      | 25                           | 22 (88.0%)  | 0 ( 0.0%)  | 0 ( 0.0%) | 3 (12.0%)         |
| 54                                                 | 89                        | 270                                      | 9                            | 5 (55.6%)   | 1 (11.1%)  | 0 ( 0.0%) | 3 (33.3%)         |
| 60                                                 | 89                        | 275                                      | 4                            | 2 (50.0%)   | 0 ( 0.0%)  | 0 ( 0.0%) | 2 (50.0%)         |
| <b><i>Invasive Treatment Group (N=367)</i></b>     |                           |                                          |                              |             |            |           |                   |
| 0                                                  | 0                         | 0                                        | 367                          | 359 (97.8%) | 8 ( 2.2%)  | 0 ( 0.0%) | 0 ( 0.0%)         |
| 1.5                                                | 7                         | 0                                        | 360                          | 317 (88.1%) | 34 ( 9.4%) | 1 ( 0.3%) | 8 ( 2.2%)         |
| 3                                                  | 13                        | 0                                        | 354                          | 302 (85.3%) | 41 (11.6%) | 1 ( 0.3%) | 10 ( 2.8%)        |
| 6                                                  | 22                        | 0                                        | 345                          | 310 (89.9%) | 25 ( 7.2%) | 2 ( 0.6%) | 8 ( 2.3%)         |
| 12                                                 | 37                        | 0                                        | 330                          | 281 (85.2%) | 30 ( 9.1%) | 3 ( 0.9%) | 16 ( 4.8%)        |
| 18                                                 | 53                        | 3                                        | 311                          | 270 (86.8%) | 22 ( 7.1%) | 3 ( 1.0%) | 16 ( 5.1%)        |
| 24                                                 | 66                        | 62                                       | 239                          | 205 (85.8%) | 17 ( 7.1%) | 4 ( 1.7%) | 13 ( 5.4%)        |
| 30                                                 | 73                        | 142                                      | 152                          | 124 (81.6%) | 12 ( 7.9%) | 4 ( 2.6%) | 12 ( 7.9%)        |
| 36                                                 | 79                        | 181                                      | 107                          | 86 (80.4%)  | 9 ( 8.4%)  | 4 ( 3.7%) | 8 ( 7.5%)         |
| 42                                                 | 84                        | 223                                      | 60                           | 46 (76.7%)  | 5 ( 8.3%)  | 4 ( 6.7%) | 5 ( 8.3%)         |
| 48                                                 | 84                        | 250                                      | 33                           | 22 (66.7%)  | 2 ( 6.1%)  | 4 (12.1%) | 5 (15.2%)         |
| 54                                                 | 85                        | 264                                      | 18                           | 8 (44.4%)   | 1 ( 5.6%)  | 4 (22.2%) | 5 (27.8%)         |
| 60                                                 | 85                        | 270                                      | 12                           | 3 (25.0%)   | 0 ( 0.0%)  | 4 (33.3%) | 5 (41.7%)         |

**8 Supplemental Table 3: Odds Ratios (95% Credible Intervals) for Better Health Status Over Time\***

| Month | SAQ-7 Summary Score          | SAQ-7 Angina Frequency Score | SAQ-7 Quality of Life Score  | SAQ-7 Physical Limitation Score | Rose Dyspnea Score           | EQ-5D Visual Analog Scale    |
|-------|------------------------------|------------------------------|------------------------------|---------------------------------|------------------------------|------------------------------|
| 1.5   | 1.20 (0.76, 1.66)<br>Pr=0.81 | 1.40 (0.80, 2.06)<br>Pr=0.90 | 1.26 (0.76, 1.75)<br>Pr=0.85 | 0.99 (0.52, 1.47)<br>Pr=0.43    | 0.98 (0.56, 1.44)<br>Pr=0.42 | 1.54 (0.95, 2.19)<br>Pr=0.98 |
| 3     | 1.48 (0.90, 2.16)<br>Pr=0.95 | 1.61 (0.75, 2.60)<br>Pr=0.92 | 1.55 (0.87, 2.31)<br>Pr=0.95 | 1.22 (0.56, 1.95)<br>Pr=0.70    | 1.17 (0.60, 1.79)<br>Pr=0.67 | 1.83 (1.06, 2.71)<br>Pr=0.99 |
| 6     | 1.13 (0.61, 1.69)<br>Pr=0.65 | 1.47 (0.57, 2.53)<br>Pr=0.82 | 1.23 (0.62, 1.92), Pr=0.73   | 0.99 (0.42, 1.65)<br>Pr=0.42    | 0.92 (0.48, 1.46)<br>Pr=0.33 | 1.18 (0.66, 1.81)<br>Pr=0.70 |
| 12    | 1.06 (0.55, 1.62)<br>Pr=0.53 | 1.32 (0.51, 2.33)<br>Pr=0.72 | 1.39 (0.68, 2.26)<br>Pr=0.84 | 0.95 (0.35, 1.70)<br>Pr=0.37    | 1.13 (0.50, 1.85)<br>Pr=0.59 | 1.16 (0.60, 1.79)<br>Pr=0.67 |
| 18    | 1.30 (0.68, 2.02)<br>Pr=0.80 | 1.06 (0.39, 1.86)<br>Pr=0.49 | 1.62 (0.76, 2.59)<br>Pr=0.93 | 0.66 (0.24, 1.19)<br>Pr=0.11    | 1.18 (0.52, 1.93)<br>Pr=0.64 | 1.24 (0.62, 1.95)<br>Pr=0.74 |
| 24    | 1.59 (0.77, 2.49)<br>Pr=0.93 | 1.38 (0.54, 2.43)<br>Pr=0.76 | 1.38 (0.66, 2.23)<br>Pr=0.82 | 1.16 (0.37, 2.11)<br>Pr=0.57    | 1.07 (0.50, 1.75)<br>Pr=0.52 | 0.78 (0.39, 1.25)<br>Pr=0.16 |
| 30    | 1.34 (0.69, 2.12)<br>Pr=0.81 | 1.24 (0.49, 2.15)<br>Pr=0.68 | 1.22 (0.59, 1.93)<br>Pr=0.70 | 1.30 (0.45, 2.36)<br>Pr=0.69    | 1.07 (0.52, 1.67)<br>Pr=0.53 | 0.81 (0.42, 1.30)<br>Pr=0.19 |
| 36    | 1.16 (0.45, 2.03)<br>Pr=0.59 | 1.20 (0.35, 2.39)<br>Pr=0.56 | 1.10 (0.43, 1.92)<br>Pr=0.53 | 1.54 (0.39, 3.16)<br>Pr=0.73    | 1.10 (0.43, 1.89)<br>Pr=0.53 | 0.85 (0.35, 1.44)<br>Pr=0.26 |

\*Model odds ratios (posterior mean and 95% credible intervals). “Pr” denotes posterior probability that the odds ratio is >1.0.

**9 Supplemental Table 4. Time-Averaged Area Under the Curve through 48 Months (Posterior Mean and 95% Credible Intervals)**

|                                 | <b>Invasive</b>   | <b>Conservative</b> | <b>Difference</b>   |
|---------------------------------|-------------------|---------------------|---------------------|
| SAQ-7 Summary Score             | 82.2 (80.0, 84.4) | 81.4 (79.4, 83.6)   | 0.7 (-2.0, 3.4)     |
| SAQ-7 Angina Frequency Score    | 96.9 (95.8, 98.0) | 96.4 (95.2, 97.4)   | 0.5 (-0.9, 1.8)     |
| SAQ-7 Quality of Life Score     | 74.9 (71.2, 78.3) | 73.6 (70.0, 76.9)   | 1.3 (-3.1, 5.5)     |
| SAQ-7 Physical Limitation Score | 77.8 (73.5, 81.9) | 76.6 (72.4, 80.7)   | 1.2 (-4.2, 6.2)     |
| Rose Dyspnea Scale              | 1.07 (0.87, 1.27) | 1.08 (0.90, 1.28)   | -0.01 (-0.22, 0.21) |
| EQ-5D Visual Analog Scale       | 63.8 (61.9, 65.7) | 64.2 (62.3, 66.0)   | -0.4 (-2.8, 2.1)    |



**10 Supplemental Table 5: Comparison of Odds Ratios for Higher SAQ Summary Scores in Models Ignoring Death and in Joint Models of Survival and Health Status\***

**SAQ-7 Summary Score – All Patients**

| <b>Month</b> | <b>Deaths Ignored</b>     | <b>Joint QOL-Survival Model</b> |
|--------------|---------------------------|---------------------------------|
| 1.5          | 1.20 (0.76, 1.66) Pr=0.81 | 1.21 (0.77, 1.68) Pr=0.81       |
| 3            | 1.48 (0.90, 2.16) Pr=0.95 | 1.49 (0.88, 2.19) Pr=0.95       |
| 6            | 1.13 (0.61, 1.69) Pr=0.65 | 1.14 (0.63, 1.74) Pr=0.66       |
| 12           | 1.06 (0.55, 1.62) Pr=0.53 | 1.06 (0.56, 1.63) Pr=0.53       |
| 24           | 1.59 (0.77, 2.49) Pr=0.93 | 1.58 (0.80, 2.52) Pr=0.93       |
| 36           | 1.16 (0.45, 2.03) Pr=0.59 | 1.16 (0.44, 2.01) Pr=0.58       |
| 48           | 0.94 (0.11, 2.19) Pr=0.34 | 0.94 (0.14, 2.23) Pr=0.34       |

\*Model odds ratios (posterior mean and 95% highest posterior density intervals). “Pr” denotes posterior probability that the odds ratio is >1.0.

11 Suppl Table 6: Posterior Probabilities of Treatment Effect Compared to Main Trial

|                            | Probability of a greater Odds Ratio in ISCHEMIA vs. ISCHEMIA-CKD |
|----------------------------|------------------------------------------------------------------|
| <i>All patients</i>        |                                                                  |
| Month 3                    | 0.94                                                             |
| Month 12                   | 0.99                                                             |
| Month 36                   | 0.93                                                             |
| <i>Daily/weekly angina</i> |                                                                  |
| Month 3                    | 0.38                                                             |
| Month 12                   | 0.86                                                             |
| Month 36                   | 0.77                                                             |
| <i>Monthly angina</i>      |                                                                  |
| Month 3                    | 0.96                                                             |
| Month 12                   | 0.96                                                             |
| Month 36                   | 0.76                                                             |
| <i>No angina</i>           |                                                                  |
| Month 3                    | 0.37                                                             |
| Month 12                   | 0.91                                                             |
| Month 36                   | 0.73                                                             |

## 12 Supplement 7: The 7-item Seattle Angina Questionnaire

### The Seattle Angina Questionnaire-7

1. The following is a list of activities that people often do during the week. Although for some people with several medical problems it is difficult to determine what it is that limits them, please go over the activities listed below and indicate how much limitation you have had **due to chest pain, chest tightness or angina over the past 4 weeks**.

Place an X in one box on each line.

| Activity                                                      | Extremely limited        | Quite a bit limited      | Moderately Limited       | Slightly limited         | Not at all limited       | Limited for other reasons or did not do the activity |
|---------------------------------------------------------------|--------------------------|--------------------------|--------------------------|--------------------------|--------------------------|------------------------------------------------------|
| a. Walking indoors on level ground                            | <input type="checkbox"/>                             |
| b. Gardening, vacuuming or carrying groceries                 | <input type="checkbox"/>                             |
| c. Lifting or moving heavy objects (e.g. furniture, children) | <input type="checkbox"/>                             |

2. Over the past 4 weeks, on average, how many times have you had **chest pain, chest tightness or angina**?

I have had **chest pain, chest tightness or angina**...

|                          |                          |                                            |                          |                          |                            |
|--------------------------|--------------------------|--------------------------------------------|--------------------------|--------------------------|----------------------------|
| 4 or more times per day  | 1-3 times per day        | 3 or more times per week but not every day | 1-2 times per week       | Less than once a week    | None over the past 4 weeks |
| <input type="checkbox"/> | <input type="checkbox"/> | <input type="checkbox"/>                   | <input type="checkbox"/> | <input type="checkbox"/> | <input type="checkbox"/>   |

3. Over the past 4 weeks, on average, how many times have you had to take nitroglycerin (nitroglycerin tablets or spray) for your **chest pain, chest tightness or angina**?

I have taken nitroglycerin...

|                          |                          |                                            |                          |                          |                            |
|--------------------------|--------------------------|--------------------------------------------|--------------------------|--------------------------|----------------------------|
| 4 or more times per day  | 1-3 times per day        | 3 or more times per week but not every day | 1-2 times per week       | Less than once a week    | None over the past 4 weeks |
| <input type="checkbox"/> | <input type="checkbox"/> | <input type="checkbox"/>                   | <input type="checkbox"/> | <input type="checkbox"/> | <input type="checkbox"/>   |

4. Over the past 4 weeks, how much has your **chest pain, chest tightness or angina** limited your enjoyment of life?

|                                                      |                                                        |                                                       |                                                     |                                                       |
|------------------------------------------------------|--------------------------------------------------------|-------------------------------------------------------|-----------------------------------------------------|-------------------------------------------------------|
| It has <b>extremely</b> limited my enjoyment of life | It has limited my enjoyment of life <b>quite a bit</b> | It has <b>moderately</b> limited my enjoyment of life | It has <b>slightly</b> limited my enjoyment of life | It has <b>not</b> limited my enjoyment of life at all |
| <input type="checkbox"/>                             | <input type="checkbox"/>                               | <input type="checkbox"/>                              | <input type="checkbox"/>                            | <input type="checkbox"/>                              |

5. If you had to spend the rest of your life with your **chest pain, chest tightness or angina** the way it is right now, how would you feel about this?

|                                               |                          |                          |                          |                          |
|-----------------------------------------------|--------------------------|--------------------------|--------------------------|--------------------------|
| <input type="checkbox"/> Not satisfied at all | Mostly dissatisfied      | Somewhat satisfied       | Mostly satisfied         | Completely satisfied     |
| <input type="checkbox"/>                      | <input type="checkbox"/> | <input type="checkbox"/> | <input type="checkbox"/> | <input type="checkbox"/> |
